# Supplementary material
Source: Elsevier journal article supplement (https://www.sciencedirect.com/science/article/pii/S2530064421000729)
Supplement: mmc1 [file S2530064421000729:mmc1.xlsx]

## Sheet: Database
Citation	Year	Journal	Journal Impact Factor (2015)	Total number of authors	Number of Caribbean-based authors	Authorship type	Caribbean author location	Caribbean author	Caribbean lead	Full reference
Acevedo 2007	2007	Ornitologia Neotropical	0.309	1	1	Carib_only	OT	Yes	Yes	Acevedo MA (2007) Bird feeding behavior as a measure of restoration success in a Caribbean forested wetland. Ornitologia Neotropical 18:305-310
Acevedo & Aide 2008	2008	Caribbean Journal of Science	0.353	2	2	Carib_only	OT	Yes	Yes	Acevedo MA, Aide TM (2008) Bird Community Dynamics and Habitat Associations in Karst, Mangrove and Pterocarpus Forest Fragments in an Urban Zone in Puerto Rico. Caribbean Journal of Science 44:402-416
Adams et al 2014	2014	Fish and Fisheries	8.258	9	0	Foreign_only	NA	No	No	Adams, A.J., Horodysky, A.Z., McBride, R.S., Guindon, K., Shenker, J., MacDonald, T.C., Harwell, H.D., Ward, R., Carpenter, K., 2014. Global conservation status and research needs for tarpons (Megalopidae), ladyfishes (Elopidae) and bonefishes (Albulidae). Fish and Fisheries 15, 280-311.
Agnoletti et al 2015	2015	Biodiversity and Conservation	2.365	3	0	Foreign_only	NA	No	No	Agnoletti, M., Tredici, M., Santoro, A., 2015. Biocultural diversity and landscape patterns in three historical rural areas of Morocco, Cuba and Italy. Biodiversity and Conservation 24, 3387-3404.
Aguila 2013	2013	Zookeys	0.933	1	1	Carib_only	SS	Yes	Yes	Aguila, R.N., 2013. Eremonidiopsis aggregata, gen. n., sp. n. from Cuba, the third West Indian Dioptinae (Lepidoptera, Notodontidae). Zookeys 10.3897/zookeys.333.5483, 77-91.
Aide & Grau 2004	2004	Science	33.611	2	1	Carib_&_Foreign	OT	Yes	Yes	Aide, T. M., and Grau, H. R., 2012. Globalization, Migration, and Latin American Ecosystems. Science 305, 1915-1916
Alberts 2007	2007	Applied Animal Behaviour Science	1.691	1	0	Foreign_only	NA	No	No	Alberts, A.C., 2007. Behavioral considerations of headstarting as a conservation strategy for endangered Caribbean rock iguanas. Applied Animal Behaviour Science 102, 380-391.
Albrecht et al 2013	2013	Journal of Coastal Conservation	0.898	4	0	Foreign_only	NA	No	No	Albrecht, M., Kneeland, K. M., Lindroth, E., & Foster, J. E., 2013. Genetic diversity and relatedness of the mangrove Rhizophora mangle L.(Rhizophoraceae) using amplified fragment polymorphism (AFLP) among locations in Florida, USA and the Caribbean. Journal of Coastal Conservation 17, 483-491
Alemu 2014	2014	Revista de Biologia Tropical	0.524	1	1	Carib_only	SS	Yes	Yes	Alemu, J. B., 2014. Fish assemblages on fringing reefs in the southern Caribbean: biodiversity, biomass and feeding types. Revista de Biologia Tropical 62, 169-181
Alemu et al 2008	2008	EcoHealth	2.451	8	7	Carib_&_Foreign	SS	Yes	Yes	Alemu, I.J., Cazabon, M.N., Dempewolf, L., Hailey, A., Lehtinen, R.M., Mannette, R.P., Naranjit, K.T., Roach, A.C., 2008. Presence of the chytrid fungus Batrachochytrium dendrobatidis in populations of the critically endangered frog Mannophryne olmonae in Tobago, West Indies. Ecohealth 5, 34-39.
Allcorn et al 2012	2012	The Condor	1	10	2	Carib_&_Foreign	OT	Yes	No	Allcorn, R. I., Hilton, G. M., Fenton, K., Atkinson, P. A., Bowden, C. G. R, Gray, G. A. L., Hulme, M., Madden, J., Mackley, E. K., Oppel, S., 2012. Demography and Breeding Ecology of the Critically Endangered Montserrat Oriole. The Condor 114, 227-235
Allgeier et al 2014	2014	Global Change Biology	8.044	4	0	Foreign_only	NA	No	No	Allgeier, J.E., Layman, C.A., Mumby, P.J., Rosemond, A.D., 2014. Consistent nutrient storage and supply mediated by diverse fish communities in coral reef ecosystems. Glob Chang Biol 20, 2459-2472.
Alvarez-Aleman 2010	2010	Aquatic Mammals	1.015	3	1	Carib_&_Foreign	SS	Yes	Yes	Alvarez-Alemán, A., Beck, C. A., & Powell, J. A., 2010. First report of a Florida manatee (Trichechus manatus latirostris) in Cuba. Aquatic Mammals 36, 148.
Alvarez-Filip et al 2009	2009	Proceedings of the Royal Society B-Biological Sciences	5.051	5	0	Foreign_only	NA	No	No	Alvarez-Filip, L., Dulvy, N.K., Gill, J.A., Cote, I.M., Watkinson, A.R., 2009. Flattening of Caribbean coral reefs: region-wide declines in architectural complexity. Proc Biol Sci 276, 3019-3025.
Alvarez-Filip et al 2011	2011	Global Change Biology	8.044	5	0	Foreign_only	NA	No	No	Alvarez-Filip, L., Coté, I.M., Gill, J.A., Watkinson, A.R., Dulvy, N.K., 2011. Region-wide temporal and spatial variation in Caribbean reef architecture: is coral cover the whole story? Global Change Biology 17, 2470-2477.
Alves-Stanley et al 2010	2010	Marine Ecology Progress Series	2.619	3	0	Foreign_only	NA	No	No	Alves-Stanley, C.D., Worthy, G.A.J., Bonde, R.K., 2010. Feeding preferences of West Indian manatees in Florida, Belize, and Puerto Rico as indicated by stable isotope analysis. Marine Ecology Progress Series 402, 255-267.
Amori et al 2012	2012	Mammalia	0.681	3	0	Foreign_only	NA	No	No	Amori, G., Gippoliti, S., Luiselli, L., 2012. Ecological correlates of threatened endemic island rodents. Mammalia 76, 15-20
Andraca-Gomez et al 2015	2015	Biological Invasions	2.586	9	2	Carib_&_Foreign	SS	Yes	No	Andraca-Gómez, G., Ordano, M., Boege, K., Domínguez, C.A., Piñero, D., Pérez-Ishiwara, R., Pérez-Camacho, J., Cañizares, M., Fornoni, J., 2015. A potential invasion route of Cactoblastis cactorum within the Caribbean region matches historical hurricane trajectories. Biological Invasions 17, 1397-1406.
Andras et al 2013	2013	Molecular Ecology	6.494	3	0	Foreign_only	NA	No	No	Andras, J.P., Rypien, K.L., Harvell, C.D., 2013. Range-wide population genetic structure of the Caribbean sea fan coral, Gorgonia ventalina. Mol Ecol 22, 56-73.
Aranda et al 2014	2014	Bulletin of Marine Science	1.306	8	2	Carib_&_Foreign	SS	Yes	No	Aldana Aranda, D., Oxenford, H. A., Bissada, C., Enriquez Díaz, M., Brulé, T., Delgado, G. A., Martínez Morales, I., Frenkiel, L., 2014. Reproductive patterns of queen conch, Strombus gigas (Mollusca Gastropoda), across the wider Caribbean region. Bulletin of Marine Science 90, 813-831
Archer et al 2012	2012	Current Zoology	1.594	7	3	Carib_&_Foreign	OT	Yes	Yes	Archer SK, Heppell SA, Semmens BX, Pattengill-Semmens CV, Bush PG, McCoy CM, Johnson BC (2012) Patterns of color phase indicate spawn timing at a Nassau grouper Epinephelus striatus spawning aggregation. Current Zoology 58:73-83
Armenteros et al 2009	2009	Esturaine Coastal and Shelf Science	2.057	7	5	Carib_&_Foreign	SS	Yes	Yes	Armenteros, M., Ruiz-Abierno, A., Fernández-Garcés, R., Pérez-García, J.A., Díaz-Asencio, L., Vincx, M., Decraemer, W., 2009. Biodiversity patterns of free-living marine nematodes in a tropical bay: Cienfuegos, Caribbean Sea. Estuarine, Coastal and Shelf Science 85, 179-189.
Arnoux et al 2013	2013	Journal of Ornithology	1.711	6	0	Foreign_only	NA	No	No	Arnoux, E., Eraud, C., Thomas, A., Cavallo, F., Garnier, S., Faivre, B., 2013. Phenotypic variation of Forest Thrushes Turdus lherminieri in Guadeloupe: evidence for geographic differentiation at fine spatial scale. Journal of Ornithology 154, 977-985.
Aronson & Precht 2006	2006	Coral Reefs	3.324	2	0	Foreign_only	NA	No	No	Aronson, R.B., Precht, W.F., 2006. Conservation, precaution, and Caribbean reefs. Coral Reefs 25, 441-450.
Auster et al 2005	2005	Environmental Biology of Fishes	1.57	3	0	Foreign_only	NA	No	No	Auster, P.J., Semmens, B.X., Barber, K., 2005. Pattern in the Co-occurrence of Fishes Inhabiting the Coral Reefs of Bonaire, Netherlands Antilles. Environmental Biology of Fishes 74, 187-194.
Baisre 2013	2013	Conservation Biology	4.165	1	1	Carib_only	SS	Yes	Yes	Baisre, J.A., 2013. Shifting baselines and the extinction of the Caribbean monk seal. Conserv Biol 27, 927-935.
Baptiste & Nardenstam 2009	2009	Environmental Conservation	2.368	2	0	Foreign_only	NA	No	No	Baptiste, A. K., & Nordenstam, B. J., 2009. Impact of oil and gas drilling in Trinidad: factors influencing environmental attitudes and behaviours within three rural wetland communities. Environmental Conservation 36, 14-21.
Barker et al 2015	2015	Ecography	4.774	3	0	Foreign_only	NA	No	No	Barker, B.S., Rodriguez-Robles, J.A., Cook, J.A., 2015. Climate as a driver of tropical insular diversity: comparative phylogeography of two ecologically distinctive frogs in Puerto Rico. Ecography 38, 769-781.
Baums 2008	2008	Molecular Ecology	6.494	1	0	Foreign_only	NA	No	No	Baums, I.B., 2008. A restoration genetics guide for coral reef conservation. Mol Ecol 17, 2796-2811.
Baums et al 2005	2005	Molecular Ecology	6.494	3	0	Foreign_only	NA	No	No	Baums, I.B., Miller, M.W., Hellberg, M.E., 2005. Regionally isolated populations of an imperiled Caribbean coral, Acropora palmata. Mol Ecol 14, 1377-1390.
Bayha & Dawson 2010	2010	Biological Bulletin	1.638	2	0	Foreign_only	NA	No	No	Bayha, K. M., Dawson, M. N., 2010. New Family of Allomorphic Jellyfishes, Drymonematidae (Scyphozoa, Discomedusae), Emphasizes Evolution in the Functional Morphology and Trophic Ecology of Gelatinous Zooplankton. Biological Bulletin 219, 249-267
Bejarano et al 2014	2014	Coral Reefs	3.324	3	3	Carib_only	OT	Yes	Yes	Bejarano, I., Appeldoorn, R.S., Nemeth, M., 2014. Fishes associated with mesophotic coral ecosystems in La Parguera, Puerto Rico. Coral Reefs 33, 313-328.
Bejarano et al 2015	2015	Marine Biology	2.391	4	3	Carib_&_Foreign	OT	Yes	Yes	Bejarano, S., Lohr, K., Hamilton, S., Manfrino, C., 2014. Relationships of invasive lionfish with topographic complexity, groupers, and native prey fishes in Little Cayman. Marine Biology 162, 253-266.
Bell et al 2007	2007	Animal Conservation	2.852	7	5	Carib_&_Foreign	OT	Yes	Yes	Bell, C.D., Solomon, J.L., Blumenthal, J.M., Austin, T.J., Ebanks-Petrie, G., Broderick, A.C., Godley, B.J., 2007. Monitoring and conservation of critically reduced marine turtle nesting populations: lessons from the Cayman Islands. Animal Conservation 10, 39-47.
Beltran et al 2015	2015	Conservation Genetics Resources	1.172	4	3	Carib_&_Foreign	OT	Yes	Yes	Beltran, D., Schizas, N. V., Prada, C., & Appeldoorn, R., 2015. Isolation and characterization of 12 microsatellite loci to study connectivity in the yellow jawfish Opistognathus aurifrons. Conservation Genetics Resources 7, 543-545.
Bernard et al 2012	2012	Conservation Genetics Resources	1.172	5	1	Carib_&_Foreign	OT	Yes	No	Bernard, A.M., Feldheim, K.A., Richards, V.P., Nemeth, R.S., Shivji, M.S., 2012. Development and characterization of fifteen novel microsatellite loci for the Nassau grouper (Epinephelus striatus) and their utility for cross-amplification on a suite of closely related species. Conservation Genetics Resources 4, 983-986.
Bjorholm et al 2008	2008	BMC Ecology	2.36	4	0	Foreign_only	NA	No	No	Bjorholm, S., Svenning, J.C., Skov, F., Balslev, H., 2008. To what extent does Tobler's 1st law of geography apply to macroecology? A case study using American palms (Arecaceae). BMC Ecol 8, 11.
Bjorndal et al 2003	2003	Marine Ecology Progress Series	2.619	3	0	Foreign_only	NA	No	No	Bjorndal KA, Bolten AB, Chaloupka MY (2003) Survival probability estimates for immature green turtles Chelonia mydas in the Bahamas. Mar Ecol-Prog Ser 252:273-281
Blaber 2013	2013	Esturaine Coastal and Shelf Science	2.057	1	0	Foreign_only	NA	No	No	Blaber, S.J.M., 2013. Fishes and fisheries in tropical estuaries: The last 10 years. Estuarine, Coastal and Shelf Science 135, 57-65.
Black et al 2014	2014	Journal of Experimental Marine Biology and Ecology	0.953	5	0	Foreign_only	NA	No	No	Black, A.N., Weimann, S.R., Imhoff, V.E., Richter, M.L., Itzkowitz, M., 2014. A differential prey response to invasive lionfish, Pterois volitans: Prey naiveté and risk-sensitive courtship. Journal of Experimental Marine Biology and Ecology 460, 1-7.
Blumenthal et al 2009	2009	Molecular Ecology	6.494	11	3	Carib_&_Foreign	OT	Yes	Yes	Blumenthal, J.M., Abreu-Grobois, F.A., Austin, T.J., Broderick, A.C., Bruford, M.W., Coyne, M.S., Ebanks-Petrie, G., Formia, A., Meylan, P.A., Meylan, A.B., Godley, B.J., 2009. Turtle groups or turtle soup: dispersal patterns of hawksbill turtles in the Caribbean. Mol Ecol 18, 4841-4853.
Boal et al 2013	2013	Ornitologia Neotropical	0.309	3	2	Carib_&_Foreign	OT	Yes	Yes	Boal CW, Wunderle JM, Arendt WJ (2013) Autumn monitoring of resident avifauna on Guana Island, British Virgin Islands. Ornitologia Neotropical 24:335-343
Bode et al 2012	2012	The American Naturalist	3.832	3	0	Foreign_only	NA	No	No	Bode, M., Connolly, S.R., Pandolfi, J.M., 2012. Species differences drive nonneutral structure in pleistocene coral communities. Am Nat 180, 577-588.
Bongaerts et al 2010	2010	Coral Reefs	3.324	4	1	Carib_&_Foreign	OT	Yes	Yes	Bongaerts, P., Ridgway, T., Sampayo, E.M., Hoegh-Guldberg, O., 2010. Assessing the ‘deep reef refugia’ hypothesis: focus on Caribbean reefs. Coral Reefs 29, 309-327.
Borroto-Paez et al 2015	2015	Herpetological Conservation and Biology	0.595	4	3	Carib_&_Foreign	SS	Yes	Yes	Borroto-Paez R, Bosch RA, Fabres BA, Garcia OA (2015) Introduced amphibians and reptiles in the Cuban archipelago. Herpetol Conserv Biol 10:985-1012
Bowen et al 2007	2007	Molecular Ecology	6.494	7	1	Carib_&_Foreign	OT	Yes	No	Bowen, B.W., Grant, W.S., Hillis-Starr, Z., Shaver, D.J., Bjorndal, K.A., Bolten, A.B., Bass, A.L., 2007. Mixed-stock analysis reveals the migrations of juvenile hawksbill turtles (Eretmochelys imbricata) in the Caribbean Sea. Mol Ecol 16, 49-60.
Brace et al 2012	2012	Molecular Ecology	6.494	7	0	Foreign_only	NA	No	No	Brace, S., Barnes, I., Powell, A., Pearson, R., Woolaver, L.G., Thomas, M.G., Turvey, S.T., 2012. Population history of the Hispaniolan hutia Plagiodontia aedium (Rodentia: Capromyidae): testing the model of ancient differentiation on a geotectonically complex Caribbean island. Mol Ecol 21, 2239-2253.
Brandt & McManus 2009	2009	Diseases of Aquatic Organisms	1.752	2	0	Foreign_only	NA	No	No	Brandt, M.E., McManus, J.W., 2009. Dynamics and impact of the coral disease white plague: insights from a simulation model. Dis Aquat Organ 87, 117-133.
Briggs 2005	2005	Biological Conservation	3.762	1	0	Foreign_only	NA	No	No	Briggs, J.C., 2005. Coral reefs: Conserving the evolutionary sources. Biological Conservation 126, 297-305.
Briggs 2007	2007	Diversity and Distributions	3.667	1	0	Foreign_only	NA	No	No	Briggs, J.C., 2007. Marine longitudinal biodiversity: causes and conservation. Diversity and Distributions 13, 544-555.
Brocke et al 2015	2015	Plos One	3.234	6	1	Carib_&_Foreign	OT	Yes	Yes	Brocke, H.J., Polerecky, L., de Beer, D., Weber, M., Claudet, J., Nugues, M.M., 2015. Organic matter degradation drives benthic cyanobacterial mat abundance on Caribbean coral reefs. PLoS One 10, e0125445.
Brooks & Smith 2001	2001	Science	33.611	2	0	Foreign_only	NA	No	No	Brooks, T. and Smith, M. L., 2001. Caribbean Catastrophes. Science 294, 1469-1470
Brooks et al 2002	2002	Conservation Biology	4.165	11	0	Foreign_only	NA	No	No	Brooks TM, Mittermeier RA, Mittermeier CG, da Fonseca GAB, Rylands AB, Konstant WR, Flick P, Pilgrim J, Oldfield S, Magin G, Hilton-Taylor C (2002) Habitat loss and extinction in the hotspots of biodiversity. Conserv Biol 16:909-923
Brooks et al 2012	2012	Comparative Biochemestry and Physiology, Part A	1.966	10	2	Carib_&_Foreign	SS	Yes	Yes	Brooks, E.J., Mandelman, J.W., Sloman, K.A., Liss, S., Danylchuk, A.J., Cooke, S.J., Skomal, G.B., Philipp, D.P., Sims, D.W., Suski, C.D., 2012. The physiological response of the Caribbean reef shark (Carcharhinus perezi) to longline capture. Comp Biochem Physiol A Mol Integr Physiol 162, 94-100.
Brooks et al 2013	2013	Marine Biology	2.391	4	1	Carib_&_Foreign	SS	Yes	Yes	Brooks, E.J., Sims, D.W., Danylchuk, A.J., Sloman, K.A., 2013. Seasonal abundance, philopatry and demographic structure of Caribbean reef shark (Carcharhinus perezi) assemblages in the north-east Exuma Sound, The Bahamas. Marine Biology 160, 2535-2546.
Bruckner 2005	2005	Revista de Biologia Tropical	0.524	1	0	Foreign_only	NA	No	No	Bruckner, A. W., 2005. The importance of the marine ornamental reef fish trade in the wider Caribbean. Revista de biología tropical 53, 127-137.
Bruckner et al 2014	2014	Revista de Biologia Tropical	0.524	3	0	Foreign_only	NA	No	No	Bruckner, A. W., Beck, B., Renaud, P., 2014. The status of coral reefs and associated fishes and invertebrates of commercial importance in Pedro Bank, Jamaica. Revista de Biologia Tropical 62, 11-24
Bruno et al 2014	2014	Marine Pollution Bulletin	2.991	4	0	Foreign_only	NA	No	No	Bruno, J.F., Precht, W.F., Vroom, P.S., Aronson, R.B., 2014. Coral reef baselines: how much macroalgae is natural? Mar Pollut Bull 80, 24-29.
Buckley 2013	2013	Annals of the New York Academy of Sciences	4.383	1	0	Foreign_only	NA	No	No	Buckley, L.B., 2013. Get real: putting models of climate change and species interactions in practice. Ann N Y Acad Sci 1297, 126-138.
Budd 2000	2000	Coral Reefs	3.324	1	0	Foreign_only	NA	No	No	Budd AF (2000) Diversity and extinction in the Cenozoic history of Caribbean reefs. Coral Reefs 19:25-35
Budd & Pandolfi 2010	2010	Science	33.611	2	0	Foreign_only	NA	No	No	Budd, A.F., Pandolfi, J.M., 2010. Evolutionary novelty is concentrated at the edge of coral species distributions. Science 328, 1558-1561.
Caballero et al 2011	2011	Animal Conservation	2.852	7	1	Carib_&_Foreign	OT	Yes	Yes	Caballero, S., Islas-Villanueva, V., Tezanos-Pinto, G., Duchene, S., Delgado-Estrella, A., Sanchez-Okrucky, R., Mignucci-Giannoni, A. A., 2011. Phylogeography, genetic diversity and population structure of common bottlenose dolphins in the Wider Caribbean inferred from analyses of mitochondrial DNA control region sequences and microsatellite loci: conservation and management implications. Animal …
Calonje et al 2013	2013	Oryx	1.849	7	2	Carib_&_Foreign	SS	Yes	No	Calonje, M., Meerow, A. W., Knowles, L., Knowles, D., Griffith, M. P., Nakamura, K., Francisco-Ortega, J. (2013). Cycad biodiversity in the Bahamas Archipelago and conservation genetics of the threatened Zamia lucayana (Zamiaceae). Oryx 47, 190-198.
Calsbeek & Smith 2003	2003	Nature	41.456	2	0	Foreign_only	NA	No	No	Calsbeek, R., Smith, T. B., 2003. Ocean currents mediate evolution in island lizards. Nature 426, 552-555
Cantrell 2004	2004	Caribbean Journal of Science	0.353	1	1	Carib_only	OT	Yes	Yes	Cantrell SA (2004) A comparison of two sampling strategies to assess discomycete diversity in wet tropical forests. Caribbean Journal of Science 40:8-16
Cardoso & Braga 2015	2015	Systematic Botany	1.229	2	0	Foreign_only	NA	No	No	Cardoso, L.J.T., Braga, J.M.A., 2015. A New Caribbean Species of <I>Helosis</I> (Balanophoraceae) with a Revised Key to the Genus. Systematic Botany 40, 597-603.
Carlos-Junior et al 2015	2015	Marine Environmental Research	2.762	4	0	Foreign_only	NA	No	No	Carlos-Junior, L.A., Barbosa, N.P., Moulton, T.P., Creed, J.C., 2015. Ecological Niche Model used to examine the distribution of an invasive, non-indigenous coral. Mar Environ Res 103, 115-124.
Carpenter et al 2008	2008	Science	33.611	39	1	Carib_&_Foreign	OT	Yes	No	Carpenter KE, Abrar M, Aeby G, Aronson RB, Banks S, Bruckner A, Chiriboga A, Cortes J, Delbeek JC, DeVantier L, Edgar GJ, Edwards AJ, Fenner D, Guzman HM, Hoeksema BW, Hodgson G, Johan O, Licuanan WY, Livingstone SR, Lovell ER, Moore JA, Obura DO, Ochavillo D, Polidoro BA, Precht WF, Quibilan MC, Reboton C, Richards ZT, Rogers AD, Sanciangco J, Sheppard A, Sheppard C, Smith J, Stuart S, Turak E, …
Carrigan & Puotinen 2014	2014	Global Change Biology	8.044	2	0	Foreign_only	NA	No	No	Carrigan, A.D., Puotinen, M., 2014. Tropical cyclone cooling combats region-wide coral bleaching. Glob Chang Biol 20, 1604-1613.
Cascante-Marin & Nivia-Ruiz 2013	2013	Biodiversity and Conservation	2.365	2	0	Foreign_only	NA	No	No	Cascante-Marín, A., Nivia-Ruíz, A., 2013. Neotropical flowering epiphyte diversity: local composition and geographic affinities. Biodiversity and Conservation 22, 113-125.
Cassey et al 2007	2007	Diversity and Distributions	3.667	3	0	Foreign_only	NA	No	No	Cassey, P., Lockwood, J.L., Blackburn, T.M., Olden, J.D., 2007. Spatial scale and evolutionary history determine the degree of taxonomic homogenization across island bird assemblages. Diversity and Distributions 13, 458-466.
Ceccarelli et al 2014	2014	Journal of Hymenoptera Research	0.903	4	1	Carib_&_Foreign	SS	Yes	No	Ceccarelli, F., Robinson, D., Clebsch, H., Zaldivar-Riveron, A., 2014. Parasitoid wasps from three Jamaican localities: A pilot study. Journal of Hymenoptera Research 37, 127-135.
Chapman & Kramer 2000	2000	Environmental Biology of Fishes	1.57	2	0	Foreign_only	NA	No	No	Chapman MR, Kramer DL (2000) Movements of fishes within and among fringing coral reefs in barbados. Environ Biol Fishes 57:11-24
Chapman et al 2006	2006	Science	33.611	3	0	Foreign_only	NA	No	No	Chapman, D. D. F., Pikitch, E. K., Babcock, E. A., 2006. Marine parks need sharks? Science 312, 526-527
Chollett & Mumby 2013	2013	Biological Conservation	3.762	2	0	Foreign_only	NA	No	No	Chollett, I., Mumby, P.J., 2013. Reefs of last resort: Locating and assessing thermal refugia in the wider Caribbean. Biological Conservation 167, 179-186.
Christenhusz & Toivonen 2008	2008	Biological Invasions	2.586	2	0	Foreign_only	NA	No	No	Christenhusz, M.J.M., Toivonen, T.K., 2008. Giants invading the tropics: the oriental vessel fern, Angiopteris evecta (Marattiaceae). Biological Invasions 10, 1215-1228.
Coehlo & Manfrino 2007	2007	Aquatic Conservation- Marine and Freshwater Ecosystems	2.136	2	0	Foreign_only	NA	No	No	Coelho, V.R., Manfrino, C., 2007. Coral community decline at a remote Caribbean island: marine no-take reserves are not enough. Aquatic Conservation: Marine and Freshwater Ecosystems 17, 666-685.
Colston et al 2013	2013	Molecular Phylogenetics and Evolution	3.916	11	0	Foreign_only	NA	No	No	Colston, T.J., Grazziotin, F.G., Shepard, D.B., Vitt, L.J., Colli, G.R., Henderson, R.W., Blair Hedges, S., Bonatto, S., Zaher, H., Noonan, B.P., Burbrink, F.T., 2013. Molecular systematics and historical biogeography of tree boas (Corallus spp.). Mol Phylogenet Evol 66, 953-959.
Cook et al 2015	2015	Marine Ecology Progress Series	2.619	4	0	Foreign_only	NA	No	No	Cook, C.A., Sikkel, P.C., Renoux, L.P., Smit, N.J., 2015. Blood parasite biodiversity of reef-associated fishes of the eastern Caribbean. Marine Ecology Progress Series 533, 1-13.
Correa et al 2009	2009	Marine Biology	2.391	3	0	Foreign_only	NA	No	No	Correa, A.M.S., McDonald, M.D., Baker, A.C., 2009. Development of clade-specific Symbiodinium primers for quantitative PCR (qPCR) and their application to detecting clade D symbionts in Caribbean corals. Marine Biology 156, 2403-2411.
Coté et al 2005	2005	Philosophical Transactions of the Royal Society B-Biological Sciences	7.055	4	0	Foreign_only	NA	No	No	Cote, I.M., Gill, J.A., Gardner, T.A., Watkinson, A.R., 2005. Measuring coral reef decline through meta-analyses. Philos Trans R Soc Lond B Biol Sci 360, 385-395.
Crain & Tremblay 2014	2014	Diversity and Distributions	3.667	2	2	Carib_only	OT	Yes	Yes	Crain, B.J., Tremblay, R.L., 2014. Do richness and rarity hotspots really matter for orchid conservation in light of anticipated habitat loss? Diversity and Distributions 20, 652-662.
Crews et al 2010	2010	Molecular Phylogenetics and Evolution	3.916	4	1	Carib_&_Foreign	OT	Yes	No	Crews, S.C., Puente-Rolon, A.R., Rutstein, E., Gillespie, R.G., 2010. A comparison of populations of island and adjacent mainland species of Caribbean Selenops (Araneae: Selenopidae) spiders. Mol Phylogenet Evol 54, 970-983.
Cumberlidge et al 2014	2014	Zookeys	0.933	3	0	Foreign_only	NA	No	No	Cumberlidge, N., Alvarez, F., Villalobos, J.L., 2014. Results of the global conservation assessment of the freshwater crabs (Brachyura, Pseudothelphusidae and Trichodactylidae): The Neotropical region, with an update on diversity. Zookeys 10.3897/zookeys.457.6598, 133-157.
Dalsgaard et al 2012	2012	Ornitologia Neotropical	0.309	7	2	Carib_&_Foreign	SS	Yes	No	Dalsgaard, B., Carstensen, D. W., Kirkconnell, A., Martín González, A. M., Martínez García, O., Timmermann, A., Sutherland, W. J., 2012. Floral traits of plants visited by the bee hummingbird (Mellisuga helenae). Ornitologia tropical 23, 143-149
Dalton et al 2012	2012	Environmental Management	1.724	3	0	Foreign_only	NA	No	No	Dalton, T., Forrester, G., Pollnac, R., 2012. Participation, process quality, and performance of marine protected areas in the wider Caribbean. Environ Manage 49, 1224-1237.
Daltry et al 2015	2015	Oryx	1.849	5	3	Carib_&_Foreign	SS	Yes	Yes	Daltry, J.C., Prospere, A., Toussaint, A., Gengelbach, J., Morton, M.N., 2015. Making business scents: how to harvest incense sustainably from the globally threatened lansan treeProtium attenuatum. Oryx 49, 431-441.
Davalos 2005	2005	Molecular Phylogenetics and Evolution	3.916	1	0	Foreign_only	NA	No	No	Davalos, L.M., 2005. Molecular phylogeny of funnel-eared bats (Chiroptera: Natalidae), with notes on biogeography and conservation. Mol Phylogenet Evol 37, 91-103.
Davies et al 2013	2013	Marine Biodiversity	1.104	7	0	Foreign_only	NA	No	No	Davies, S.W., Rahman, M., Meyer, E., Green, E.A., Buschiazzo, E., Medina, M., Matz, M.V., 2013. Novel polymorphic microsatellite markers for population genetics of the endangered Caribbean star coral, Montastraea faveolata. Marine Biodiversity 43, 167-172.
Dawson 2002	2002	Coral Reefs	3.324	1	0	Foreign_only	NA	No	No	Dawson, J., 2002. Biogeography of azooxanthellate corals in the Caribbean and surrounding areas. Coral Reefs 21, 27-40.
Dawson et al 2015	2015	Conservation Biology	4.165	8	0	Foreign_only	NA	No	No	Dawson, J., Oppel, S., Cuthbert, R.J., Holmes, N., Bird, J.P., Butchart, S.H., Spatz, D.R., Tershy, B., 2015. Prioritizing islands for the eradication of invasive vertebrates in the United Kingdom overseas territories. Conserv Biol 29, 143-153.
de Mitcheson et al 2013	2013	Fish and Fisheries	8.258	18	1	Carib_&_Foreign	OT	Yes	No	Sadovy de Mitcheson, Y., Craig, M.T., Bertoncini, A.A., Carpenter, K.E., Cheung, W.W.L., Choat, J.H., Cornish, A.S., Fennessy, S.T., Ferreira, B.P., Heemstra, P.C., Liu, M., Myers, R.F., Pollard, D.A., Rhodes, K.L., Rocha, L.A., Russell, B.C., Samoilys, M.A., Sanciangco, J., 2013. Fishing groupers towards extinction: a global assessment of threats and extinction risks in a billion dollar fishery.…
Debrot & van Soest 2001	2001	Caribbean Journal of Science	0.353	2	2	Carib_only	OT	Yes	Yes	Debrot, A. O., & Soest, R. W. M., 2001. First records of the freshwater sponges Corvoheteromeyenia heterosclera and (Porifera: Spongillidae) from Curacao with species descriptions and data from transplantation experiments. Caribbean Journal of Science 334, 88-94.
Debrot et al 2005	2005	Caribbean Journal of Science	0.353	5	5	Carib_only	OT	Yes	Yes	Debrot AO, Esteban N, Le Scao R, Caballero A, Hoetjes PC (2005) New sea turtle nesting records for the Netherlands Antilles provide impetus to conservation action. Caribbean Journal of Science 41:334-339
Debrot et al 2013	2013	Caribbean Journal of Science	0.353	5	2	Carib_&_Foreign	OT	Yes	Yes	Debrot AO, Esteban N, Bervoets T, Hoetjes PC, Scheidat M (2013) Marine Mammals of the Northeastern Caribbean Windward Dutch Islands: Saba, St. Eustatius, St. Maarten, and the Saba Bank. Caribbean Journal of Science 47:159-172
Deem et al 2008	2008	Journal of Avian Medecine and Surgery	0.393	5	0	Foreign_only	NA	No	No	Deem, S. L., Ladwig, E., Cray, C., Karesh, W. B., Amato, G., 2008. Health Assessment of the Ex Situ Population of St Vincent Parrots (Amazona guildingii ) in St Vincent and the Grenadines. Journal of Avian Medicine and Surgery 22,114-122
Delgado-Acevedo & Restrepo 2008	2008	Conservation Biology	4.165	2	2	Carib_only	OT	Yes	Yes	Delgado-Acevedo, J., Restrepo, C., 2008. The contribution of habitat loss to changes in body size, allometry, and bilateral asymmetry in two Eleutherodactylus frogs from Puerto Rico. Conserv Biol 22, 773-782.
Deyoung et al 2008	2008	Trends in Ecology and Evolution	16.196	7	0	Foreign_only	NA	No	No	deYoung, B., Barange, M., Beaugrand, G., Harris, R., Perry, R.I., Scheffer, M., Werner, F., 2008. Regime shifts in marine ecosystems: detection, prediction and management. Trends Ecol Evol 23, 402-409.
Dhoray & Teelucksingh 2007	2007	Journal of Environment Management	2.723	2	2	Carib_only	SS	Yes	Yes	Dhoray, S., Teelucksingh, S.S., 2007. The implications of ecosystem dynamics for fisheries management: a case study of selected fisheries in the Gulf of Paria, Trinidad. J Environ Manage 85, 415-428.
Diaz 2012	2012	Hydrobiologia	2.275	1	0	Foreign_only	NA	No	No	Diaz, M.C., 2011. Mangrove and coral reef sponge faunas: untold stories about shallow water Porifera in the Caribbean. Hydrobiologia 687, 179-190.
Diaz-Ferguson et al 2010	2010	Plos One	3.234	4	0	Foreign_only	NA	No	No	Diaz-Ferguson, E., Haney, R.A., Wares, J.P., Silliman, B.R., 2010. Population genetics of a trochid gastropod broadens picture of Caribbean Sea connectivity. PLoS One 5.
Dick et al 2003	2003	The American Naturalist	3.832	3	0	Foreign_only	NA	No	No	Dick, C. W., Abdul-Salim, K., Bermingham, E., 2003. Molecular Systematic Analysis Reveals Cryptic Tertiary Diversification of a Widespread Tropical Rain Forest Tree. The American Naturalist 162, 691-703
Ditmer & Stapleton 2012	2012	Plos One	3.234	2	1	Carib_&_Foreign	SS	Yes	Yes	Ditmer, M.A., Stapleton, S.P., 2012. Factors affecting hatch success of hawksbill sea turtles on Long Island, Antigua, West Indies. PLoS One 7, e38472.
Dorenbosch et al 2006	2006	Biological Conservation	3.762	4	0	Foreign_only	NA	No	No	Dorenbosch, M., Grol, M.G.G., Nagelkerken, I., van der Velde, G., 2006. Seagrass beds and mangroves as potential nurseries for the threatened Indo-Pacific humphead wrasse, Cheilinus undulatus and Caribbean rainbow parrotfish, Scarus guacamaia. Biological Conservation 129, 277-282.
Dunne et al 2004	2004	Marine Ecology Progress Series	2.619	3	0	Foreign_only	NA	No	No	Dunne JA, Williams RJ, Martinez ND (2004) Network structure and robustness of marine food webs. Mar Ecol-Prog Ser 273:291-302
Dutton et al 2005	2005	Biological Conservation	3.762	4	1	Carib_&_Foreign	OT	Yes	Yes	Dutton, D.L., Dutton, P.H., Chaloupka, M., Boulon, R.H., 2005. Increase of a Caribbean leatherback turtle Dermochelys coriacea nesting population linked to long-term nest protection. Biological Conservation 126, 186-194.
Eales et al 2008	2008	Molecular Ecology	6.494	3	0	Foreign_only	NA	No	No	Eales, J., Thorpe, R.S., Malhotra, A., 2008. Weak founder effect signal in a recent introduction of Caribbean Anolis. Mol Ecol 17, 1416-1426.
Edmunds et al 2014	2014	Plos One	3.234	23	1	Carib_&_Foreign	OT	Yes	No	Edmunds, P.J., Adjeroud, M., Baskett, M.L., Baums, I.B., Budd, A.F., Carpenter, R.C., Fabina, N.S., Fan, T.Y., Franklin, E.C., Gross, K., Han, X., Jacobson, L., Klaus, J.S., McClanahan, T.R., O'Leary, J.K., van Oppen, M.J., Pochon, X., Putnam, H.M., Smith, T.B., Stat, M., Sweatman, H., van Woesik, R., Gates, R.D., 2014. Persistence and change in community composition of reef corals through presen…
Edwards et al 2011	2011	Global Change Biology	8.044	9	0	Foreign_only	NA	No	No	Edwards, H.J., Elliott, I.A., Eakin, C.M., Irikawa, A., Madin, J.S., McField, M., Morgan, J.A., Van Woesik, R., Mumby, P.J., 2011. How much time can herbivore protection buy for coral reefs under realistic regimes of hurricanes and coral bleaching? Global Change Biology 17, 2033-2048.
Ehrhardt 2005	2005	Bulletin of Marine Science	1.306	1	0	Foreign_only	NA	No	No	Ehrhardt NM (2005) Population dynamic characteristics and sustainability mechanisms in key western central Atlantic spiny lobster, Panulirus argus, fisheries. Bull Mar Sci 76:501-525
Ereskovsky et al 2014	2014	Journal of the Marine Biological Association of the UK	1.064	3	0	Foreign_only	NA	No	No	Ereskovsky, A.V., Lavrov, D.V., Willenz, P., 2014. Five new species of Homoscleromorpha (Porifera) from the Caribbean Sea and re-description ofPlakina jamaicensis. Journal of the Marine Biological Association of the United Kingdom 94, 285-307.
Eristhee & Oxenford 2001	2001	Journal of Fish Biology	1.658	2	2	Carib_only	SS+OT	Yes	Yes	Eristhee, N., Oxenford, H. A. 2001. Home range size and use of space by Bermuda chub Kyphosus sectatrix (L.) in two marine reserves in the Soufriere Marine Management Area, St Lucia, West Indies. Journal of Fish Biology 59, 129-151.
Erwin & Szmant 2010	2010	Coral Reefs	3.324	2	0	Foreign_only	NA	No	No	Erwin, P.M., Szmant, A.M., 2010. Settlement induction of Acropora palmata planulae by a GLW-amide neuropeptide. Coral Reefs 29, 929-939.
Esposito et al 2015	2015	Molecular Phylogenetics and Evolution	3.916	8	3	Carib_&_Foreign	OT	Yes	No	Esposito, L.A., Bloom, T., Caicedo-Quiroga, L., Alicea-Serrano, A.M., Sanchez-Ruiz, J.A., May-Collado, L.J., Binford, G.J., Agnarsson, I., 2015. Islands within islands: Diversification of tailless whip spiders (Amblypygi, Phrynus) in Caribbean caves. Mol Phylogenet Evol 93, 107-117.
Esteban et al 2015	2015	Marine Biology	2.391	5	2	Carib_&_Foreign	OT	Yes	Yes	Esteban, N., van Dam, R.P., Harrison, E., Herrera, A., Berkel, J., 2015. Green and hawksbill turtles in the Lesser Antilles demonstrate behavioural plasticity in inter-nesting behaviour and post-nesting migration. Marine Biology 162, 1153-1163.
Etienne et al 2015	2015	Florida Entomologist	0.997	3	2	Carib_&_Foreign	OT	Yes	Yes	Etienne, J., Ryckewaert, P., Michel, B., 2015. Thrips (Insecta: Thysanoptera) of Guadeloupe and Martinique: Updated Check-List with New Information on Their Ecology and Natural Enemies. Florida Entomologist 98, 298-304.
Etnoyer et al 2010	2010	Plos One	3.234	3	0	Foreign_only	NA	No	No	Etnoyer, P.J., Wirshing, H.H., Sanchez, J.A., 2010. Rapid assessment of octocoral diversity and habitat on Saba Bank, Netherlands Antilles. PLoS One 5, e10668.
Filipowics & Renner 2012	2012	Molecular Phylogenetics and Evolution	3.916	2	0	Foreign_only	NA	No	No	Filipowicz, N., Renner, S.S., 2012. Brunfelsia (Solanaceae): a genus evenly divided between South America and radiations on Cuba and other Antillean islands. Mol Phylogenet Evol 64, 1-11.
Forrester et al 2013	2013	Marine Ecology	1.076	4	0	Foreign_only	NA	No	No	Forrester, G.E., Taylor, K., Schofield, S., Maynard, A., 2013. Colony growth of corals transplanted for restoration depends on their site of origin and environmental factors. Marine Ecology 34, 186-192.
Fouquet et al 2013	2013	Systematics and Biodiversity	2.191	7	2	Carib_&_Foreign	OT	Yes	No	Fouquet, A., Pineau, K., Rodrigues, M. T., Mailles, J., Schneider, J. B., Ernst, R., & Dewynter, M., 2013. Endemic or exotic: the phylogenetic position of the Martinique Volcano Frog Allobates chalcopis (Anura: Dendrobatidae) sheds light on its origin and challenges current conservation strategies. Systematics and biodiversity 11, 87-101.
Francisco-Ramos & Arias-Gonzalez 2013	2013	Plos One	3.234	2	0	Foreign_only	NA	No	No	Francisco-Ramos, V., Arias-Gonzalez, J.E., 2013. Additive partitioning of coral reef fish diversity across hierarchical spatial scales throughout the Caribbean. PLoS One 8, e78761.
Freile et al 2014	2014	The Condor	1	3	0	Foreign_only	NA	No	No	Freile, J.F., Greeney, H.F., Bonaccorso, E., 2014. Current Neotropical ornithology: Research progress 1996–2011. The Condor 116, 84-96.
Fricke et al 2011	2011	Botanica Marina	1.402	4	0	Foreign_only	NA	No	No	Fricke, A., Teichberg, M., Beilfuss, S., Bischof, K., 2011. Succession patterns in algal turf vegetation on a Caribbean coral reef. Botanica Marina 54.
Funk & Fa 2006	2006	Conservation Genetics	2.185	2	0	Foreign_only	NA	No	No	Funk, S.M., Fa, J.E., 2006. Phylogeography of the endemic St. Lucia whiptail lizard Cnemidophorus vanzoi: Conservation genetics at the species boundary. Conservation Genetics 7, 651-663.
Funk et al 2007	2007	Conservation Genetics	2.185	3	0	Foreign_only	NA	No	No	Funk, W.C., Mullins, T.D., Haig, S.M., 2007. Conservation genetics of snowy plovers (Charadrius alexandrinus) in the Western Hemisphere: population genetic structure and delineation of subspecies. Conservation Genetics 8, 1287-1309.
Gaiser et al 2010	2010	Proceedings of the Academy of Natural Sciences of Philadelphia	0.833	4	0	Foreign_only	NA	No	No	Gaiser, E., Hée, J.M.L., Tobias, F.A.C., Wachnicka, A.H., 2010. Mastogloia smithiivarlacustrisGrun.: A Structural Engineer of Calcareous Mats in Karstic Subtropical Wetlands. Proceedings of the Academy of Natural Sciences of Philadelphia 160, 99-112.
Galea & Ferry 2013	2013	Zootaxa	0.906	2	1	Carib_&_Foreign	OT	Yes	Yes	Galea, H.R., Ferry, R., 2013. Podocoryna martinicana, a new species of athecate hydroid (Cnidaria: Hydrozoa: Hydractiniidae) from the Caribbean. Zootaxa 3710, 578-590.
Garcia & Bertsh 2009	2009	Scientia Marina	1.144	2	0	Foreign_only	NA	No	No	García, F.J., Bertsch, H., 2009. Diversidad y distribución de los Gasterópodos Opistobranquios del Océano Atlántico. Un enfoque biogeográfico global. Scientia Marina 73.
Garcia et al 2015	2015	Marine Environmental Research	2.762	3	0	Foreign_only	NA	No	No	Garcia, J., Mourier, J., Lenfant, P., 2015. Spatial behavior of two coral reef fishes within a Caribbean marine protected area. Mar Environ Res 109, 41-51.
Garraway et al 2008	2008	Journal of Insect Conservation	1.717	5	3	Carib_&_Foreign	SS	Yes	Yes	Garraway, E., Bailey, A.J.A., Freeman, B.E., Parnell, J.R., Emmel, T.C., 2008. Population studies and conservation of Jamaica’s endangered swallowtail butterfly Papilio (Pterourus) homerus. Journal of Insect Conservation 12, 383-397.
Garrido et al 2005	2005	Ornitologia Neotropical	0.309	3	2	Carib_&_Foreign	SS	Yes	Yes	Garrido OH, Wiley JW, Kirkconnell A (2005) The genus Icterus in the West Indies. Ornitologia Neotropical 16:449-470
Garrison & Ward 2012	2012	Revista de Biologia Tropical	0.524	2	0	Foreign_only	NA	No	No	Garrison VH, Ward G (2012) Transplantation of storm-generated coral fragments to enhance Caribbean coral reefs: A successful method but not a solution. Rev Biol Trop 60:59-70
Genoways et al 2007	2007	Acta Chiropterologica	1.133	4	0	Foreign_only	NA	No	No	Genoways, H.H., Larsen, P.A., Pedersen, S.C., Huebschman, J.J., 2007. Bats of Saba, Netherlands Antilles: a zoogeographic perspective. Acta Chiropterologica 9, 97-114.
Georges et al 2007	2007	Marine Ecology Progress Series	2.619	10	0	Foreign_only	NA	No	No	Georges JY, Fossette S, Billes A, Ferraroli S, Fretey J, Gremillet D, Le Maho Y, Myers AE, Tanaka H, Hays GC (2007) Meta-analysis of movements in Atlantic leatherback turtles during the nesting season: conservation implications. Mar Ecol-Prog Ser 338:225-232
Gleffe et al 2006	2006	Ornitologia Neotropical	0.309	4	0	Foreign_only	NA	No	No	Gleffe JD, Collazo JA, Groom MJ, Miranda-Castro L (2006) Avian reproduction and the conservation value of shaded coffee plantations. Ornitologia Neotropical 17:271-282
Gloeckner et al 2014	2014	Biological Bulletin	1.638	10	0	Foreign_only	NA	No	No	Gloeckner, V., Wehrl, M., Moitinho-Silva, L., Gernert, C., Schupp, P., Pawlik, J.R., Lindquist, N.L., Erpenbeck, D., Worheide, G., Hentschel, U., 2014. The HMA-LMA dichotomy revisited: an electron microscopical survey of 56 sponge species. Biol Bull 227, 78-88.
Glor et al 2001	2001	Biodiversity and Conservation	2.365	4	0	Foreign_only	NA	No	No	Glor RE, Flecker AS, Benard MF, Power AG (2001) Lizard diversity and agricultural disturbance in a Caribbean forest landscape. Biodivers Conserv 10:711-723
Gomez et al 2011	2011	Malacologia	0.532	3	0	Foreign_only	NA	No	No	Gomez, M.I., Strong, E.E., Glaubrecht, M., 2011. Redescription and Anatomy of the Viviparous Freshwater GastropodHemisinus lineolatus(W. Wood, 1828) from Jamaica (Cerithioidea, Thiaridae). Malacologia 53, 229-250.
Goodbody-Gringley et al 2012	2012	Marine Ecology	1.076	3	0	Foreign_only	NA	No	No	Goodbody-Gringley, G., Woollacott, R.M., Giribet, G., 2012. Population structure and connectivity in the Atlantic scleractinian coral Montastraea cavernosa (Linnaeus, 1767). Marine Ecology 33, 32-48.
Gorman & Haig 2002	2002	Journal of Field Ornithology	0.988	2	0	Foreign_only	NA	No	No	Gorman, L.R., Haig, S.M., 2002. Distribution and abundance of Snowy Plovers in eastern North America, the Caribbean, and the Bahamas. Journal of Field Ornithology 73, 38-52.
Gratwicke & Speight 2005	2005	Marine Ecology Progress Series	2.619	2	0	Foreign_only	NA	No	No	Gratwicke B, Speight MR (2005) Effects of habitat complexity on Caribbean marine fish assemblages. Mar Ecol-Prog Ser 292:301-310
Green & Bruckner 2000	2000	Biological Conservation	3.762	2	0	Foreign_only	NA	No	No	Green EP, Bruckner AW (2000) The significance of coral disease epizootiology for coral reef conservation. Biol Conserv 96:347-361
Green & Donelly 2003	2003	Ambio	2.641	2	0	Foreign_only	NA	No	No	Green, E., Donnelly, R., 2003. Recreational scuba diving in Caribbean marine protected areas: do the users pay? Ambio 32, 140-144.
Green et al 2011	2011	Waterbirds	0.637	5	0	Foreign_only	NA	No	No	Green, M.C., Hill, A., Troy, J.R., Holderby, Z., Geary, B., 2011. Status of Breeding Reddish Egrets on Great Inagua, Bahamas with Comments on Breeding Territoriality and the Effects of Hurricanes. Waterbirds 34, 213-217.
Green et al 2013	2013	Coral Reefs	3.324	5	1	Carib_&_Foreign	SS	Yes	No	Green, S.J., Tamburello, N., Miller, S.E., Akins, J.L., Côté, I.M., 2013. Habitat complexity and fish size affect the detection of Indo-Pacific lionfish on invaded coral reefs. Coral Reefs 32, 413-421.
Grol et al 2011	2011	Oecologia	3.093	4	0	Foreign_only	NA	No	No	Grol, M.G., Nagelkerken, I., Rypel, A.L., Layman, C.A., 2011. Simple ecological trade-offs give rise to emergent cross-ecosystem distributions of a coral reef fish. Oecologia 165, 79-88.
Grol et al 2014	2014	Marine Ecology Progress Series	2.619	3	0	Foreign_only	NA	No	No	Grol, M.G.G., Rypel, A.L., Nagelkerken, I., 2014. Growth potential and predation risk drive ontogenetic shifts among nursery habitats in a coral reef fish. Marine Ecology Progress Series 502, 229-244.
Guarderas et al 2008	2008	Conservation Biology	4.165	3	0	Foreign_only	NA	No	No	Guarderas, A.P., Hacker, S.D., Lubchenco, J., 2008. Current status of marine protected areas in latin america and the Caribbean. Conserv Biol 22, 1630-1640.
Gutierrez-Rodriguez et al 2009	2009	Molecular Phylogenetics and Evolution	3.916	4	0	Foreign_only	NA	No	No	Gutierrez-Rodriguez, C., Barbeitos, M.S., Sanchez, J.A., Lasker, H.R., 2009. Phylogeography and morphological variation of the branching octocoral Pseudopterogorgia elisabethae. Mol Phylogenet Evol 50, 1-15.
Gutierrez-Rodriguez & Lasker 2004	2004	Molecular Ecology	6.494	2	0	Foreign_only	NA	No	No	Gutierrez-Rodriguez, C., Lasker, H.R., 2004. Microsatellite variation reveals high levels of genetic variability and population structure in the gorgonian coral Pseudopterogorgia elisabethae across the Bahamas. Mol Ecol 13, 2211-2221.
Gutierrez-Rodriguez & Lasker 2004	2004	Invertebrate Biology	1.2	2	0	Foreign_only	NA	No	No	Gutierrez-Rodriguez, C., Lasker, H. R., 2004. Reproductive biology, development, and planula behavior in the Caribbean gorgonian Pseudopterogorgia elisabethae. Invertebrate Biology 123, 54-67
Hagedorn et al 2012	2012	Plos One	3.234	20	0	Foreign_only	NA	No	No	Hagedorn, M., Carter, V., Martorana, K., Paresa, M.K., Acker, J., Baums, I.B., Borneman, E., Brittsan, M., Byers, M., Henley, M., Laterveer, M., Leong, J.A., McCarthy, M., Meyers, S., Nelson, B.D., Petersen, D., Tiersch, T., Uribe, R.C., Woods, E., Wildt, D., 2012. Preserving and using germplasm and dissociated embryonic cells for conserving Caribbean and Pacific coral. PLoS One 7, e33354.
Hallworth et al 2015	2015	Ecological Applications	4.093	5	0	Foreign_only	NA	No	No	Hallworth MT, Sillett TS, Van Wilgenburg SL, Hobson KA, Marra PP (2015) Migratory connectivity of a Neotropical migratory songbird revealed by archival light-level geolocators. Ecol Appl 25:336-347
Hansen et al 2010	2010	Conservation Biology	4.165	4	0	Foreign_only	NA	No	No	Hansen, L., Hoffman, J., Drews, C., Mielbrecht, E., 2010. Designing climate-smart conservation: guidance and case studies. Conserv Biol 24, 63-69.
Harborne et al 2006	2006	Advances in Marine Biology	3.483	7	1	Carib_&_Foreign	SS	Yes	No	Harborne, A.R., Mumby, P.J., Micheli, F., Perry, C.T., Dahlgren, C.P., Holmes, K.E., Brumbaugh, D.R., 2006. The Functional Value of Caribbean Coral Reef, Seagrass and Mangrove Habitats to Ecosystem Processes, pp. 57-189.
Harborne et al 2008	2008	Ecological Applications	4.093	7	0	Foreign_only	NA	No	No	Harborne AR, Mumby PJ, Kappel CV, Dahlgren CP, Micheli F, Holmes KE, Brumbaugh DR (2008) Tropical coastal habitats as surrogates of fish community structure, grazing, and fisheries value. Ecol Appl 18:1689-1701
Harborne et al 2009	2009	Coral Reefs	3.324	4	0	Foreign_only	NA	No	No	Harborne, A.R., Renaud, P.G., Tyler, E.H.M., Mumby, P.J., 2009. Reduced density of the herbivorous urchin Diadema antillarum inside a Caribbean marine reserve linked to increased predation pressure by fishes. Coral Reefs 28, 783-791.
Harborne et al 2012	2012	Coral Reefs	3.324	4	0	Foreign_only	NA	No	No	Harborne, A.R., Jelks, H.L., Smith-Vaniz, W.F., Rocha, L.A., 2012. Abiotic and biotic controls of cryptobenthic fish assemblages across a Caribbean seascape. Coral Reefs 31, 977-990.
Hardman et al 2012	2012	Oryx	1.849	4	0	Foreign_only	NA	No	No	Hardman, C.J., Williams, S., Manco, B.N., Hamilton, M.A., 2012. Predicting the potential threat of Casuarina equisetifolia to three endemic plant species on the Turks and Caicos Islands. Oryx 46, 204-212.
Hawkes et al 2012	2012	Marine Ecology Progress Series	2.619	10	2	Carib_&_Foreign	SS+OT	Yes	No	Hawkes, L.A., Tomás, J., Revuelta, O., León, Y.M., Blumenthal, J.M., Broderick, A.C., Fish, M., Raga, J.A., Witt, M.J., Godley, B.J., 2012. Migratory patterns in hawksbill turtles described by satellite tracking. Marine Ecology Progress Series 461, 223-232.
Hawkins et al 2006	2006	Biological Conservation	3.762	5	0	Foreign_only	NA	No	No	Hawkins, J.P., Roberts, C.M., Dytham, C., Schelten, C., Nugues, M.M., 2006. Effects of habitat characteristics and sedimentation on performance of marine reserves in St. Lucia. Biological Conservation 127, 487-499.
Hawkins et al 2007	2007	Aquatic Conservation- Marine and Freshwater Ecosystems	2.136	4	0	Foreign_only	NA	No	No	Hawkins, J.P., Roberts, C.M., Gell, F.R., Dytham, C., 2007. Effects of trap fishing on reef fish communities. Aquatic Conservation: Marine and Freshwater Ecosystems 17, 111-132.
Hawthorne et al 2014	2014	Conservation Biology	4.165	3	0	Foreign_only	NA	No	No	Hawthorne, W.D., Cable, S., Marshall, C.A., 2014. Empirical trials of plant field guides. Conserv Biol 28, 654-662.
Hedges & Heinicke 2007	2007	Molecular Phylogenetics and Evolution	3.916	2	0	Foreign_only	NA	No	No	Hedges, S.B., Heinicke, M.P., 2007. Molecular phylogeny and biogeography of West Indian frogs of the genus Leptodactylus (Anura, Leptodactylidae). Mol Phylogenet Evol 44, 308-314.
Hegdes & Conn 2012	2012	Zootaxa	0.906	2	0	Foreign_only	NA	No	No	Hedges SB, Conn CE (2012) A new skink fauna from Caribbean islands (Squamata, Mabuyidae, Mabuyinae). Zootaxa 3288, 1-244
Heinicke et al 2007	2007	Proceedings of the National Academy of Sciences of the US of America	9.674	3	0	Foreign_only	NA	No	No	Heinicke MP, Duellman WE, Hedges SB (2007) Major Caribbean and Central American frog faunas originated by ancient oceanic dispersal. Proc Natl Acad Sci U S A 104:10092-10097
Helgen & Wilson 2003	2003	Journal of Zoology	1.883	2	0	Foreign_only	NA	No	No	Helgen, K.M., Wilson, D.E., 2003. Taxonomic status and conservation relevance of the raccoons (Procyon spp.) of the West Indies. Journal of Zoology 259, 69-76.
Helgen et al 2008	2008	Journal of Mammalogy	1.84	4	1	Carib_&_Foreign	SS	Yes	Yes	Helgen KM, Maldonado JE, Wilson DE, Buckner SD (2008) Molecular confirmation of the origin and invasive status of West Indian raccoons. J Mammal 89:282-291
Helmer et al 2002	2002	Caribbean Journal of Science	0.353	5	5	Carib_only	OT	Yes	Yes	Helmer, E. H., Ramos, O., del Lopez, T., Quinones, M., Diaz, W., 2002. Mapping the Forest Type and Land Cover of Puerto Rico, a Component of the Caribbean Biodiversity Hotspot. Caribbean Journal of Science. 38, 165–183
Helmer et al 2008	2008	Caribbean Journal of Science	0.353	9	3	Carib_&_Foreign	SS+OT	Yes	Yes	Helmer EH, Kennaway TA, Pedreros DH, Clark ML, Marcano-Vega H, Tieszen LL, Ruzycki TR, Schill SR, Carrington CMS. 2008. Land cover and forest formation distributions for St. Kitts, Nevis, St. Eustatius, Grenada and Barbados from decision tree classification of cloud-cleared satellite imagery. Caribbean Journal of Science 44:175-198
Helmus et al 2014	2014	Nature	41.456	3	0	Foreign_only	NA	No	No	Helmus, M.R., Mahler, D.L., Losos, J.B., 2014. Island biogeography of the Anthropocene. Nature 513, 543-546.
Hidalgo et al 2015	2015	Latin American Journal of Aquatic Research	0.564	3	1	Carib_&_Foreign	SS	Yes	No	Hidalgo, G., Toledo, W., & Granados-Barba, A., 2015. Macrofaunal diversity and taxonomic distinctness in soft bottoms of the northern and southwestern Cuban shelf. Latin Americal Journal of Aquatic Research 43, 845-855
Hill et al 2012	2012	Conservation Genetics	2.185	3	0	Foreign_only	NA	No	No	Hill, A., Green, C., Palacios, E., 2012. Genetic diversity and population structure of North America’s rarest heron, the reddish egret (Egretta rufescens). Conservation Genetics 13, 535-543.
Hochberg et al 2014	2014	Marine Biodiversity	1.104	3	0	Foreign_only	NA	No	No	Hochberg, R., Atherton, S., Kieneke, A., 2014. Marine Gastrotricha of Little Cayman Island with the description of one new species and an initial assessment of meiofaunal diversity. Marine Biodiversity 44, 89-113.
Hoeksema et al 2011	2011	Marine Ecology	1.076	7	0	Foreign_only	NA	No	No	Hoeksema, B.W., van der Land, J., van der Meij, S.E.T., van Ofwegen, L.P., Reijnen, B.T., van Soest, R.W.M., de Voogd, N.J., 2011. Unforeseen importance of historical collections as baselines to determine biotic change of coral reefs: the Saba Bank case. Marine Ecology 32, 135-141.
Hoetjes & Carpenter 2010	2010	Plos One	3.234	2	1	Carib_&_Foreign	OT	Yes	Yes	Hoetjes, P.C., Carpenter, K.E., 2010. Saving Saba bank: policy implications of biodiversity studies. PLoS One 5, e10769.
Holmes 2007	2007	Ibis	1.921	1	0	Foreign_only	NA	No	No	Holmes RT (2007) Understanding population change in migratory songbirds: long-term and experimental studies of Neotropical migrants in breeding and wintering areas. Ibis 149:2-13
Holmes 2013	2013	Conservation & Society	1.644	1	0	Foreign_only	NA	No	No	Holmes, G., 2013. Exploring the Relationship Between Local Support and the Success of Protected Areas. Conservation and Society 11.
Hoolihan et al 2015	2015	ICES Journal of Marine Science	2.377	6	0	Foreign_only	NA	No	No	Hoolihan, J.P., Luo, J., Snodgrass, D., Orbesen, E.S., Barse, A.M., Prince, E.D., 2015. Vertical and horizontal habitat use by white marlin Kajikia albida (Poey, 1860) in the western North Atlantic Ocean. ICES Journal of Marine Science 72, 2364-2373.
Horrocks et al 2011	2011	Chelonian Conservation and Biology	0.738	5	4	Carib_&_Foreign	SS	Yes	Yes	Horrocks, J.A., Krueger, B.H., Fastigi, M., Pemberton, E.L., Eckert, K.L., 2011. International Movements of Adult Female Hawksbill Turtles (Eretmochelys imbricata): First Results from the Caribbean's Marine Turtle Tagging Centre. Chelonian Conservation and Biology 10, 18-25.
Howey-Jordan et al 2013	2013	Plos One	3.234	8	3	Carib_&_Foreign	SS	Yes	No	Howey-Jordan, L.A., Brooks, E.J., Abercrombie, D.L., Jordan, L.K., Brooks, A., Williams, S., Gospodarczyk, E., Chapman, D.D., 2013. Complex movements, philopatry and expanded depth range of a severely threatened pelagic shark, the oceanic whitetip (Carcharhinus longimanus) in the western North Atlantic. PLoS One 8, e56588.
Huber 2014	2014	Journal of Arachnology	0.624	1	0	Foreign_only	NA	No	No	Huber, B.A., 2014. Progress and prospects in taxonomy: what is our goal and are we ever going to reach it? Journal of Arachnology 42, 142-147.
Huber et al 2010	2010	Zoological Journal of the Linnean Society	2.717	3	0	Foreign_only	NA	No	No	Huber, B.A., Fischer, N., Astrin, J.J., 2010. High level of endemism in Haiti's last remaining forests: a revision of Modisimus (Araneae: Pholcidae) on Hispaniola, using morphology and molecules. Zoological Journal of the Linnean Society 158, 244-299.
Hughes et al 2015	2015	Journal of Herpetology	0.832	3	1	Carib_&_Foreign	OT	Yes	Yes	Hughes, D.F., Meshaka, W.E., van Buurt, G., 2015. The Superior Colonizing GeckoHemidactylus mabouiaon Curaçao: Conservation Implications for the Native GeckoPhyllodactylus martini. Journal of Herpetology 49, 60-63.
Hurtado et al 2012	2012	Conservation Genetics	2.185	3	0	Foreign_only	NA	No	No	Hurtado, L.A., Santamaria, C.A., Fitzgerald, L.A., 2012. Conservation genetics of the Critically Endangered Saint Croix ground lizard (Ameiva polops Cope 1863). Conservation Genetics 13, 665-679.
Igulu et al 2014	2014	Plos One	3.234	9	0	Foreign_only	NA	No	No	Igulu, M.M., Nagelkerken, I., Dorenbosch, M., Grol, M.G., Harborne, A.R., Kimirei, I.A., Mumby, P.J., Olds, A.D., Mgaya, Y.D., 2014. Mangrove habitat use by juvenile reef fish: meta-analysis reveals that tidal regime matters more than biogeographic region. PLoS One 9, e114715.
Iken et al 2010	2010	Plos One	3.234	18	1	Carib_&_Foreign	SS	Yes	No	Iken, K., Konar, B., Benedetti-Cecchi, L., Cruz-Motta, J.J., Knowlton, A., Pohle, G., Mead, A., Miloslavich, P., Wong, M., Trott, T., Mieszkowska, N., Riosmena-Rodriguez, R., Airoldi, L., Kimani, E., Shirayama, Y., Fraschetti, S., Ortiz-Touzet, M., Silva, A., 2010. Large-scale spatial distribution patterns of echinoderms in nearshore rocky habitats. PLoS One 5, e13845.
Jackson et al 2014	2014	Plos One	3.234	12	4	Carib_&_Foreign	OT	Yes	No	Jackson, A.M., Semmens, B.X., Sadovy de Mitcheson, Y., Nemeth, R.S., Heppell, S.A., Bush, P.G., Aguilar-Perera, A., Claydon, J.A., Calosso, M.C., Sealey, K.S., Scharer, M.T., Bernardi, G., 2014. Population structure and phylogeography in Nassau grouper (Epinephelus striatus), a mass-aggregating marine fish. PLoS One 9, e97508.
Jennings et al 2012	2012	Journal of Coastal Conservation	0.898	7	1	Carib_&_Foreign	SS	Yes	No	Jennings, D.E., DiBattista, J.D., Stump, K.L., Hussey, N.E., Franks, B.R., Grubbs, R.D., Gruber, S.H., 2012. Assessment of the aquatic biodiversity of a threatened coastal lagoon at Bimini, Bahamas. Journal of Coastal Conservation 16, 405-428.
Jestrow et al 2010	2010	Taxon	3.299	3	1	Carib_&_Foreign	SS	Yes	No	Jestrow, B., Rodríguez, F. J., Francisco-Ortega, J., 2010. Generic delimitation in the Antillean Adelieae (Euphorbiaceae) with description of the Hispaniolan endemic genus Garciadelia. Taxon 59, 1801-1814
Jimenez-Ferbans et al 2015	2015	Zootaxa	0.906	3	0	Foreign_only	NA	No	No	Jimenez-Ferbans, L., Reyes-Castillo, P., Schuster, J.C., 2015. Passalidae (Coleoptera: Scarabaeoidea) of the Greater and Lesser Antilles. Zootaxa 3956, 491-512.
Johnson et al 2008	2008	Science	33.611	3	0	Foreign_only	NA	No	No	Johnson, K. G., Kackson, J. B. C., Budd, A. F., 2008. Caribbean reef development was independent of coral diversity over 28 million years. Science 319, 1521-1523
Johnston & Purkis 2011	2011	Marine Pollution Bulletin	2.991	2	0	Foreign_only	NA	No	No	Johnston, M.W., Purkis, S.J., 2011. Spatial analysis of the invasion of lionfish in the western Atlantic and Caribbean. Mar Pollut Bull 62, 1218-1226.
Jowers et al 2013	2013	Herpetologica	1.14	5	0	Foreign_only	NA	No	No	Jowers, M.J., Caut, S., Garcia-Mudarra, J.L., Alasaad, S., Ineich, I., 2013. Molecular Phylogenetics of the Possibly Extinct Martinique Ground Snake. Herpetologica 69.
Kaczmarsky et al 2005	2005	Caribbean Journal of Science	0.353	3	1	Carib_&_Foreign	OT	Yes	Yes	Kaczmarsky, L. T., Draud, M., Williams, E. H.2005, Is There a Relationship between Proximity to Sewage Effluent and the Prevalence of Coral Disease?. Caribbean Journal of Science 41:124-137
Kamel & Delcroix 2009	2009	Journal of Herpetology	0.832	2	1	Carib_&_Foreign	OT	Yes	Yes	Kamel, S.J., Delcroix, E., 2009. Nesting Ecology of the Hawksbill Turtle, Eretmochelys imbricata, in Guadeloupe, French West Indies from 2000–07. Journal of Herpetology 43, 367-376.
Kamel & Mrosovsky 2006	2006	Ecological Applications	4.093	2	0	Foreign_only	NA	No	No	Kamel SJ, Mrosovsky N (2006) Deforestation: Risk of sex ratio distortion in hawksbill sea turtles. Ecol Appl 16:923-931
Keller et al 2008	2008	Journal of Wildlife Diseases	1.355	9	4	Carib_&_Foreign	SS	Yes	No	Keller, M., Moliner, J.L., Vasquez, G., Cruz, D., Bello, O., Costidis, A.M., Rommel, S.A., Mays, M.B., Gearhart, S., 2008. Nephrolithiasis and pyelonephritis in two West Indian manatees (Trichechus manatus spp.). J Wildl Dis 44, 707-711.
Kellner et al 2010	2010	Ecological Applications	4.093	5	0	Foreign_only	NA	No	No	Kellner JB, Litvin SY, Hastings A, Micheli F, Mumby PJ (2010) Disentangling trophic interactions inside a Caribbean marine reserve. Ecol Appl 20:1979-1992
Kellog et al 2014	2014	Plos One	3.234	6	0	Foreign_only	NA	No	No	Kellogg, C.A., Piceno, Y.M., Tom, L.M., DeSantis, T.Z., Gray, M.A., Andersen, G.L., 2014. Comparing bacterial community composition of healthy and dark spot-affected Siderastrea siderea in Florida and the Caribbean. PLoS One 9, e108767.
Kemp et al 2015	2015	Coral Reefs	3.324	6	0	Foreign_only	NA	No	No	Kemp, D.W., Thornhill, D.J., Rotjan, R.D., Iglesias-Prieto, R., Fitt, W.K., Schmidt, G.W., 2015. Spatially distinct and regionally endemic Symbiodinium assemblages in the threatened Caribbean reef-building coral Orbicella faveolata. Coral Reefs 34, 535-547.
Kennedy & Marra 2010	2010	Biological Conservation	3.762	2	0	Foreign_only	NA	No	No	Kennedy, C.M., Marra, P.P., 2010. Matrix mediates avian movements in tropical forested landscapes: Inference from experimental translocations. Biological Conservation 143, 2136-2145.
Kieneke et al 2015	2015	Zootaxa	0.906	3	0	Foreign_only	NA	No	No	Kieneke, A., Schmidt-Rhaesa, A., Hochberg, R., 2015. A new species of Cephalodasys (Gastrotricha, Macrodasyida) from the Caribbean Sea with a determination key to species of the genus. Zootaxa 3947, 367-385.
Kobara et al 2013	2013	Oceanography and Marine Biology: An Annual Review	4.091	4	1	Carib_&_Foreign	OT	Yes	Yes	Kobara S, Heyman WD, Pittman SJ, Nemeth RS (2013) Biogeography of transient reef-fish spawning aggregations in the Caribbean: a synthesis for future research and management. In: Hughes RN, Hughes DJ (eds) Oceanography and Marine Biology: An Annual Review, Vol 51, p281-325
Kolbe et al 2004	2004	Nature	41.456	6	2	Carib_&_Foreign	SS	Yes	No	Kolbe, J. J., Glor, R. E., Rodriguez Schettino, L., Chamizo Lara, A., Larson, A., Losos, J. B., 2004. Genetic variation increases during biological invasion by a Cuban lizard. Nature 431, 177-178
Kondoh 2008	2008	Proceedings of the National Academy of Sciences of the US of America	9.674	1	0	Foreign_only	NA	No	No	Kondoh M (2008) Building trophic modules into a persistent food web. Proc Natl Acad Sci U S A 105:16631-16635
Kreiter et al 2006	2006	Zootaxa	0.906	3	1	Carib_&_Foreign	OT	Yes	Yes	Kreiter S, Tixier MS, Etienne J (2006) New records of phytoseiid mites (Acari : Mesostigmata) from the French Antilles, with description of Neoseiulus cecileae sp nov. Zootaxa:1-27
Kushlan 2007	2007	Waterbirds	0.637	1	0	Foreign_only	NA	No	No	Kushlan, J.A., 2007. Sympatric Foraging of Little Egrets and Snowy Egrets in Barbados, West Indies. Waterbirds 30, 609-612.
La Hée & Gaiser 2012	2012	Freshwater Science	1.941	2	0	Foreign_only	NA	No	No	La Hée, J.M., Gaiser, E.E., 2012. Benthic diatom assemblages as indicators of water quality in the Everglades and three tropical karstic wetlands. Freshwater Science 31, 205-221.
Labastida et al 2015	2015	Latin American Journal of Aquatic Research	0.564	6	2	Carib_&_Foreign	SS	Yes	No	Labastida E, Cobian D, Henaut Y, Garcia-Rivas MD, Chevalier PP, Machkour-M'Rabet S, 2015. The use of ISSR markers for species determination and a genetic study of the invasive lionfish in Guanahacabibes, Cuba. Lat Am J Aquat Res 43:1011-1018
Ladle et al 2012	2012	Conservation Biology	3.762	4	1	Carib_&_Foreign	OT	Yes	Yes	Ladle, R.J., Firmino, J.V., Malhado, A.C., Rodriguez-Duran, A., 2012. Unexplored diversity and conservation potential of neotropical hot caves. Conserv Biol 26, 978-982.
LaJeunesse 2001	2001	Journal of Phycology	2.844	1	0	Foreign_only	NA	No	No	LaJeunesse TC (2001) Investigating the biodiversity, ecology, and phylogeny of endosymbiotic dinoflagellates in the genus Symbiodinium using the its region: In search of a "species" level marker. J Phycol 37:866-880
Lamy et al 2013	2013	Molecular Ecology	6.494	7	0	Foreign_only	NA	No	No	Lamy, T., Jarne, P., Laroche, F., Pointier, J.P., Huth, G., Segard, A., David, P., 2013. Variation in habitat connectivity generates positive correlations between species and genetic diversity in a metacommunity. Mol Ecol 22, 4445-4456.
Larsen et al 2006	2006	Mammalia	0.681	3	0	Foreign_only	NA	No	No	Larsen, P.A., Genoways, H.H., Pedersen, S.C., 2006. New records of bats from Saint Barthélemy, French West Indies / Nouvelles captures de chauve souris de Saint Barthélemy, Antilles françaises. Mammalia 70, 321-325
Larsen et al 2007	2007	Acta Chiropterologica	1.133	6	0	Foreign_only	NA	No	No	Larsen, R. J., Boegler, K. A., Genoways, H. H., Masefield, W. P., Kirsch, R. A., Pedersen, S. C., 2007. Mist netting bias, species accumulation curves, and the rediscovery of two bats on Montserrat (Lesser Antilles). Acta Chiropterologica 9, 423–435
Larsen et al 2012	2012	Mammalian Biology	1.478	9	1	Carib_&_Foreign	OT	Yes	No	Larsen, R.J., Larsen, P.A., Genoways, H.H., Catzeflis, F.M., Geluso, K., Kwiecinski, G.G., Pedersen, S.C., Simal, F., Baker, R.J., 2012. Evolutionary history of Caribbean species of Myotis, with evidence of a third Lesser Antillean endemic. Mammalian Biology 77, 124-134.
Latta 2012	2012	Journal of Field Ornithology	0.988	1	0	Foreign_only	NA	No	No	Latta, S.C., 2012. Avian research in the Caribbean: past contributions and current priorities. Journal of Field Ornithology 83, 107-121.
Lau et al 2009	2009	Molecular Ecology Resources	3.712	7	0	Foreign_only	NA	No	No	Lau J, Alberts AC, Chemnick LG, Gerber GP, Jones KC, Mitchell AA, Ryder OA (2009) Isolation and characterization of 23 polymorphic microsatellite loci for a West Indian iguana (Cyclura pinguis) from the British Virgin Islands. Molecular Ecology Resources 9:1412-1414
Layman et al 2010	2010	Caribbean Journal of Science	0.353	5	0	Foreign_only	NA	No	No	Layman CA, Arrington DA, Kramer PA, Valentine-Rose L, Dahlgren CP (2010) Indicator Taxa to Assess Anthropogenic Impacts in Caribbean and Bahamas Tidal Creeks. Caribbean Journal of Science 46:12-18
Le Roux et al 2014	2014	Microbial Ecology	2.973	7	2	Carib_&_Foreign	OT	Yes	Yes	Le Roux, C., Muller, F., Bouvet, J.M., Dreyfus, B., Bena, G., Galiana, A., Ba, A.M., 2014. Genetic diversity patterns and functional traits of Bradyrhizobium strains associated with Pterocarpus officinalis Jacq. in Caribbean islands and Amazonian forest (French Guiana). Microb Ecol 68, 329-338.
Lea et al 2015	2015	Nature	41.456	11	0	Foreign_only	NA	No	No	Lea, J.S., Wetherbee, B.M., Queiroz, N., Burnie, N., Aming, C., Sousa, L.L., Mucientes, G.R., Humphries, N.E., Harvey, G.M., Sims, D.W., Shivji, M.S., 2015. Repeated, long-distance migrations by a philopatric predator targeting highly contrasting ecosystems. Sci Rep 5, 11202.
Legare et al 2015	2015	Marine Biology	2.391	4	1	Carib_&_Foreign	OT	Yes	Yes	Legare, B., Kneebone, J., DeAngelis, B., Skomal, G., 2015. The spatiotemporal dynamics of habitat use by blacktip (Carcharhinus limbatus) and lemon (Negaprion brevirostris) sharks in nurseries of St. John, United States Virgin Islands. Marine Biology 162, 699-716.
Lehtinen et al 2011	2011	Journal of Zoology	1.883	3	1	Carib_&_Foreign	SS	Yes	Yes	Lehtinen, R.M., Wojtowicz, E.A., Hailey, A., 2011. Male vocalizations, female discrimination and molecular phylogeny: multiple perspectives on the taxonomic status of a critically endangered Caribbean frog. Journal of Zoology 283, 117-125.
Leighton et al 2010	2010	Biological Conservation	3.762	3	1	Carib_&_Foreign	SS	Yes	No	Leighton, P.A., Horrocks, J.A., Kramer, D.L., 2010. Conservation and the scarecrow effect: Can human activity benefit threatened species by displacing predators? Biological Conservation 143, 2156-2163.
Leighton et al 2011	2011	Animal Conservation	2.852	3	1	Carib_&_Foreign	SS	Yes	No	Leighton, P.A., Horrocks, J.A., Kramer, D.L., 2011. Predicting nest survival in sea turtles: when and where are eggs most vulnerable to predation? Animal Conservation 14, 186-195.
Lentz et al 2011	2011	Plos One	3.234	3	0	Foreign_only	NA	No	No	Lentz, J.A., Blackburn, J.K., Curtis, A.J., 2011. Evaluating patterns of a white-band disease (WBD) outbreak in Acropora palmata using spatial analysis: a comparison of transect and colony clustering. PLoS One 6, e21830.
Leon & Bjorndal 2002	2002	Marine Ecology Progress Series	2.619	2	0	Foreign_only	NA	No	No	Leon YM, Bjorndal KA (2002) Selective feeding in the hawksbill turtle, an important predator in coral reef ecosystems. Mar Ecol-Prog Ser 245:249-258
Levin et al 2011	2011	International Journal for Parasitology	3.872	12	0	Foreign_only	NA	No	No	Levin, I. I., Valkiunas, G., Santiago-Alarcon, D., Cruz, L.L., Iezhova, T.A., O'Brien, S.L., Hailer, F., Dearborn, D., Schreiber, E.A., Fleischer, R.C., Ricklefs, R.E., Parker, P.G., 2011. Hippoboscid-transmitted Haemoproteus parasites (Haemosporida) infect Galapagos Pelecaniform birds: evidence from molecular and morphological studies, with a description of Haemoproteus iwa. Int J Parasitol 41, …
Levy 2008	2008	Ornitologia Neotropical	0.309	1	1	Carib_only	SS	Yes	Yes	Levy, C., 2008. History of ornithology in the Caribbean. Ornitología Neotropical 19, 415-426.
Lindsay et al 2010	2010	Mammalia	0.681	5	0	Foreign_only	NA	No	No	Lindsay, K.C., Kwiecinski, G.G., Pedersen, S.C., Bacle, J.-P., Genoways, H.H., 2010. First record of Ardops nichollsi from Antigua, Lesser Antilles. Mammalia 74, 93-95
Lipcius et al 2001	2001	Marine and Freshwater Research	1.474	3	0	Foreign_only	NA	No	No	Lipcius RN, Stockhausen WT, Eggleston DB (2001) Marine reserves for Caribbean spiny lobster: empirical evaluation and theoretical metapopulation recruitment dynamics. Marine and Freshwater Research 52:1589-1598
Littler et al 2010	2010	Plos One	3.234	3	0	Foreign_only	NA	No	No	Littler, M.M., Littler, D.S., Brooks, B.L., 2010. Marine macroalgal diversity assessment of Saba Bank, Netherlands Antilles. PLoS One 5, e10677.
Lombard et al 2010	2010	The Condor	1	3	2	Carib_&_Foreign	OT	Yes	Yes	Lombard, C.D., Collazo, J.A., McNair, D.B., 2010. Nest and Chick Survival and Colony-Site Dynamics of Least Terns in the U.S. Virgin Islands. The Condor 112, 56-64.
Lopez-Legentil & Pawlik 2009	2009	Coral Reefs	3.324	2	0	Foreign_only	NA	No	No	López-Legentil, S., Pawlik, J.R., 2009. Genetic structure of the Caribbean giant barrel sponge Xestospongia muta using the I3-M11 partition of COI. Coral Reefs 28, 157-165.
Lugo et al 2012	2012	Animal Conservation	2.852	3	2	Carib_&_Foreign	OT	Yes	Yes	Lugo, A.E., Carlo, T.A., Wunderle, J.M., 2012. Natural mixing of species: novel plant-animal communities on Caribbean Islands. Animal Conservation 15, 233-241.
Luksenburg & Parsons 2014	2014	Aquatic Conservation- Marine and Freshwater Ecosystems	2.136	2	0	Foreign_only	NA	No	No	Luksenburg, J.A., Parsons, E.C.M., 2014. Attitudes towards marine mammal conservation issues before the introduction of whale-watching: a case study in Aruba (southern Caribbean). Aquatic Conservation: Marine and Freshwater Ecosystems 24, 135-146.
Lum 2005	2005	Revista de Biologia Tropical	0.524	1	1	Carib_only	SS	Yes	Yes	Lum, L., 2005. Beach dynamics and nest distribution of the leatherback turtle (Dermochelys coriacea) at Grande Riviere Beach, Trinidad &Tobago. Revista de biología tropical 53, 239-248.
Luque & Poulin 2007	2007	Parasitology	2.56	2	0	Foreign_only	NA	No	No	Luque, J. L., & Poulin, R., 2007. Metazoan parasite species richness in Neotropical fishes: hotspots and the geography of biodiversity. Parasitology 134, 865-878.
Maharaj & New 2013	2013	Biological Conservation	3.762	2	0	Foreign_only	NA	No	No	Maharaj, S.S., New, M., 2013. Modelling individual and collective species responses to climate change within Small Island States. Biological Conservation 167, 283-291.
Maina et al 2011	2011	Plos One	3.234	5	0	Foreign_only	NA	No	No	Maina, J., McClanahan, T.R., Venus, V., Ateweberhan, M., Madin, J., 2011. Global gradients of coral exposure to environmental stresses and implications for local management. PLoS One 6, e23064.
Malcolm et al 2006	2006	Conservation Biology	4.165	5	0	Foreign_only	NA	No	No	Malcolm, J.R., Liu, C., Neilson, R.P., Hansen, L., Hannah, L., 2006. Global warming and extinctions of endemic species from biodiversity hotspots. Conserv Biol 20, 538-548.
Maljkovic & Coté 2011	2011	Biological Conservation	3.762	2	0	Foreign_only	NA	No	No	Maljković, A., Côté, I.M., 2011. Effects of tourism-related provisioning on the trophic signatures and movement patterns of an apex predator, the Caribbean reef shark. Biological Conservation 144, 859-865.
Malone et al 2000	2000	Molecular Phylogenetics and Evolution	3.916	4	0	Foreign_only	NA	No	No	Malone, C.L., Wheeler, T., Taylor, J.F., Davis, S.K., 2000. Phylogeography of the Caribbean rock iguana (Cyclura): implications for conservation and insights on the biogeographic history of the West Indies. Mol Phylogenet Evol 17, 269-279.
Mancina et al 2012	2012	Journal of Mammalogy	1.84	3	2	Carib_&_Foreign	SS	Yes	Yes	Mancina, C.A., García-Rivera, L., Miller, B.W., 2012. Wing morphology, echolocation, and resource partitioning in syntopic Cuban mormoopid bats. Journal of Mammalogy 93, 1308-1317.
Manconi & Pronzato 2005	2005	Journal of Natural History	0.881	2	0	Foreign_only	NA	No	No	Manconi, R., Pronzato, R., 2005. Freshwater sponges of the West Indies: Discovery of Spongillidae (Haplosclerida, Spongillina) from Cuba with biogeographic notes and a checklist for the Caribbean area. Journal of Natural History 39, 3235-3253.
Mandelman et al 2008	2008	Reviews in Fish Biology and Fisheries	2.726	4	0	Foreign_only	NA	No	No	Mandelman, J.W., Cooper, P.W., Werner, T.B., Lagueux, K.M., 2008. Shark bycatch and depredation in the U.S. Atlantic pelagic longline fishery. Reviews in Fish Biology and Fisheries 18, 427-442.
Manzanilla et al 2009	2009	Biological Journal of the Linnean Society	2.264	3	0	Foreign_only	NA	No	No	Manzanilla, J., La Marca, E., Garcia-Paris, M., 2009. Phylogenetic patterns of diversification in a clade of Neotropical frogs (Anura: Aromobatidae: Mannophryne). Biological Journal of the Linnean Society 97, 1850199
Marhaver et al 2015	2015	BMC Ecology	2.36	3	2	Carib_&_Foreign	OT	Yes	Yes	Marhaver, K.L., Vermeij, M.J., Medina, M.M., 2015. Reproductive natural history and successful juvenile propagation of the threatened Caribbean pillar coral Dendrogyra cylindrus. BMC Ecol 15, 9.
Maria et al 2007	2007	Journal of Zoo and Wildlife Medecine	0.424	5	1	Carib_&_Foreign	SS	Yes	Yes	Maria, R., Ramer, J., Reichard, T., Tolson, P.J., Christopher, M.M., 2007. Biochemical Reference Intervals and Intestinal Microflora of Free-Ranging Ricord's Iguanas (Cyclura Ricordii). Journal of Zoo and Wildlife Medicine 38, 414-419.
Martin et al 2013	2013	Revista de Biologia Tropical	0.524	9	0	Foreign_only	NA	No	No	Martin A, Diaz Y, Miloslavich P, Escobar-Briones E, Guerra-Garcia JM, Ortiz M, Valencia B, Giraldo A, Klein E (2013) Regional diversity of Amphipoda in the Caribbean Sea. Rev Biol Trop 61:1681-1720
Martin et al 2015	2015	Journal of Heredity	2.088	5	0	Foreign_only	NA	No	No	Martin, J.L., Knapp, C.R., Gerber, G.P., Thorpe, R.S., Welch, M.E., 2015. Phylogeography of the endangered Lesser Antillean iguana, Iguana delicatissima: a recent diaspora in an archipelago known for ancient herpetological endemism. J Hered 106, 315-321.
Martinuzzi et al 2008	2008	Revista de Biologia Tropical	0.524	7	7	Carib_only	OT	Yes	Yes	Martinuzzi S, Gould WA, Gonzalez OMR, Robles AM, Maldonado PC, Perez-Buitrago N, Caban JJF (2008) Mapping tropical dry forest habitats integrating Landsat NDVI, Ikonos imagery, and topographic information in the Caribbean Island of Mona. Rev Biol Trop 56:625-639
Mateos-Molina et al 2014	2014	Fisheries Research	1.903	4	3	Carib_&_Foreign	OT	Yes	Yes	Mateos-Molina, D., Schärer-Umpierre, M.T., Appeldoorn, R.S., García-Charton, J.A., 2014. Measuring the effectiveness of a Caribbean oceanic island no-take zone with an asymmetrical BACI approach. Fisheries Research 150, 1-10.
Mathews 2006	2006	Molecular Ecology	6.494	1	0	Foreign_only	NA	No	No	Mathews, L.M., 2006. Cryptic biodiversity and phylogeographical patterns in a snapping shrimp species complex. Mol Ecol 15, 4049-4063.
Mathews & Anker 2009	2009	Molecular Phylogenetics and Evolution	3.916	2	0	Foreign_only	NA	No	No	Mathews, L.M., Anker, A., 2009. Molecular phylogeny reveals extensive ancient and ongoing radiations in a snapping shrimp species complex (Crustacea, Alpheidae, Alpheus armillatus). Mol Phylogenet Evol 50, 268-281.
McCarthy et al 2008	2008	Caribbean Journal of Science	0.353	4	0	Foreign_only	NA	No	No	McCarthy DA, Kramer P, Price JR, Donato CL (2008) The ecological importance of a recently discovered intertidal sabellariid reef in St. Croix, US Virgin Islands. Caribbean Journal of Science 44:223-227
McClenachan & Cooper 2008	2008	Proceedings of the Royal Society B-Biological Sciences	5.051	2	0	Foreign_only	NA	No	No	McClenachan, L., Cooper, A.B., 2008. Extinction rate, historical population structure and ecological role of the Caribbean monk seal. Proc Biol Sci 275, 1351-1358.
McConney & Baldeo 2007	2007	Fisheries Research	1.903	2	2	Carib_only	SS	Yes	Yes	McConney, P., Baldeo, R., 2007. Lessons in co-management from beach seine and lobster fisheries in Grenada. Fisheries Research 87, 77-85.
McFarland et al 2013	2013	Plos One	3.234	9	4	Carib_&_Foreign	SS+OT	Yes	Yes	McFarland, K.P., Rimmer, C.C., Goetz, J.E., Aubry, Y., Wunderle, J.M., Jr., Sutton, A., Townsend, J.M., Sosa, A.L., Kirkconnell, A., 2013. A winter distribution model for Bicknell's Thrush (Catharus bicknelli), a conservation tool for a threatened migratory songbird. PLoS One 8, e53986.
McGehee 2008	2008	Caribbean Journal of Science	0.353	1	1	Carib_only	OT	Yes	Yes	McGeheee MA (2008) Changes in the Coral Reef Community of Southwest Puerto Rico 1995 to 2005. Caribbean Journal of Science 44:345-354
McGowan et al 2007	2007	Caribbean Journal of Science	0.353	5	0	Foreign_only	NA	No	No	McGowan A, Woodfield NK, Hilton G, Broderick AC, Godley BJ. 2007. A rigorous assessment of the avifauna of a small Caribbean Island: A case study in Anegada, British Virgin Islands. Caribbean Journal of Science 43:99-116
McGowan et al 2008	2008	Animal Conservation	2.852	10	6	Carib_&_Foreign	OT	Yes	No	McGowan, A., Broderick, A.C., Frett, G., Gore, S., Hastings, M., Pickering, A., Wheatley, D., White, J., Witt, M.J., Godley, B.J., 2008. Down but not out: marine turtles of the British Virgin Islands. Animal Conservation 11, 92-103.
McKenna & Etnoyer 2010	2010	Plos One	3.234	2	0	Foreign_only	NA	No	No	McKenna, S.A., Etnoyer, P., 2010. Rapid assessment of stony coral richness and condition on Saba Bank, Netherlands Antilles. PLoS One 5, e10749.
McKinnon et al 2014	2014	Annual Review of Marine Science	14.356	16	0	Foreign_only	NA	No	No	McKinnon, A.D., Williams, A., Young, J., Ceccarelli, D., Dunstan, P., Brewin, R.J., Watson, R., Brinkman, R., Cappo, M., Duggan, S., Kelley, R., Ridgway, K., Lindsay, D., Gledhill, D., Hutton, T., Richardson, A.J., 2014. Tropical marginal seas: priority regions for managing marine biodiversity and ecosystem function. Ann Rev Mar Sci 6, 415-437.
Melendez-Ackerman et al 2005	2005	Caribbean Journal of Science	0.353	9	9	Carib_only	OT	Yes	Yes	Melendez-Ackerman EJ, Aragon S, Morales-Vargas M, Sustache J, Axelrod FS, Fuentes C, Ackerman JD, Garcia M, Fernandez DS (2005) Monitoring efforts yield new plant records for Mona Island, Puerto Rico, a tropical dry forest wonderland. Caribbean Journal of Science 41:150-152
Mercado-Molina et al 2015	2015	Coral Reefs	3.324	5	5	Carib_only	OT	Yes	Yes	Mercado-Molina, A.E., Ruiz-Diaz, C.P., Pérez, M.E., Rodríguez-Barreras, R., Sabat, A.M., 2015. Demography of the threatened coral Acropora cervicornis: implications for its management and conservation. Coral Reefs 34, 1113-1124.
Micheli et al 2014	2014	Biological Conservation	3.762	10	0	Foreign_only	NA	No	No	Micheli, F., Mumby, P.J., Brumbaugh, D.R., Broad, K., Dahlgren, C.P., Harborne, A.R., Holmes, K.E., Kappel, C.V., Litvin, S.Y., Sanchirico, J.N., 2014. High vulnerability of ecosystem function and services to diversity loss in Caribbean coral reefs. Biological Conservation 171, 186-194.
Mikheyev & Mueller 2007	2007	Diversity and Distributions	3.667	2	0	Foreign_only	NA	No	No	Mikheyev, A.S., Mueller, U.G., 2007. Genetic relationships between native and introduced populations of the little fire ant Wasmannia auropunctata. Diversity and Distributions 13, 573-579.
Milian-Garcia et al 2015	2015	Heredity	3.805	8	7	Carib_&_Foreign	SS	Yes	Yes	Milian-Garcia, Y., Ramos-Targarona, R., Perez-Fleitas, E., Sosa-Rodriguez, G., Guerra-Manchena, L., Alonso-Tabet, M., Espinosa-Lopez, G., Russello, M.A., 2015. Genetic evidence of hybridization between the critically endangered Cuban crocodile and the American crocodile: implications for population history and in situ/ex situ conservation. Heredity (Edinb) 114, 272-280.
Miller & Gerstner 2002	2002	Biological Conservation	3.762	2	0	Foreign_only	NA	No	No	Miller MW, Gerstner CL (2002) Reefs of an uninhabited Caribbean island: fishes, benthic habitat, and opportunities to discern reef fishery impact. Biol Conserv 106:37-44
Miloslavich et al 2010	2010	Plos One	3.234	17	3	Carib_&_Foreign	SS+OT	Yes	Yes	Miloslavich, P., Diaz, J.M., Klein, E., Alvarado, J.J., Diaz, C., Gobin, J., Escobar-Briones, E., Cruz-Motta, J.J., Weil, E., Cortes, J., Bastidas, A.C., Robertson, R., Zapata, F., Martin, A., Castillo, J., Kazandjian, A., Ortiz, M., 2010. Marine biodiversity in the Caribbean: regional estimates and distribution patterns. PLoS One 5, e11916.
Miloslavich et al 2011	2011	Plos One	3.234	20	0	Foreign_only	NA	No	No	Miloslavich, P., Klein, E., Diaz, J.M., Hernandez, C.E., Bigatti, G., Campos, L., Artigas, F., Castillo, J., Penchaszadeh, P.E., Neill, P.E., Carranza, A., Retana, M.V., Diaz de Astarloa, J.M., Lewis, M., Yorio, P., Piriz, M.L., Rodriguez, D., Yoneshigue-Valentin, Y., Gamboa, L., Martin, A., 2011. Marine biodiversity in the Atlantic and Pacific coasts of South America: knowledge and gaps. PLoS On…
Miro-Herrans et al 2008	2008	Molecular Ecology Resources	3.712	4	2	Carib_&_Foreign	OT	Yes	Yes	Miro-Herrans, A.T., Velez-Zuazo, X., Acevedo, J.P., McMillan, W.O., 2008. Isolation and characterization of novel microsatellites from the critically endangered hawksbill sea turtle (Eretmochelys imbricata). Mol Ecol Resour 8, 1098-1101.
Mitchell et al 2011	2011	Conservation Genetics	2.185	7	0	Foreign_only	NA	No	No	Mitchell, A.A., Lau, J., Chemnick, L.G., Thompson, E.A., Alberts, A.C., Ryder, O.A., Gerber, G.P., 2011. Using microsatellite diversity in wild Anegada iguanas (Cyclura pinguis) to establish relatedness in a captive breeding group of this critically endangered species. Conservation Genetics 12, 771-781.
Moncada et al 2012	2012	Biological Conservation	3.762	8	3	Carib_&_Foreign	SS	Yes	Yes	Moncada, F.G., Hawkes, L.A., Fish, M.R., Godley, B.J., Manolis, S.C., Medina, Y., Nodarse, G., Webb, G.J.W., 2012. Patterns of dispersal of hawksbill turtles from the Cuban shelf inform scale of conservation and management. Biological Conservation 148, 191-199.
Monceau et al 2009	2009	Conservation Genetics	2.185	7	0	Foreign_only	NA	No	No	Monceau, K., Gaillard, M., Harrang, E., Santiago-Alarcon, D., Parker, P.G., Cezilly, F., Wattier, R.A., 2009. Twenty-three polymorphic microsatellite markers for the Caribbean endemic Zenaida dove, Zenaida aurita, and its conservation in related Zenaida species. Conservation Genetics 10, 1577-1581.
Monceau et al 2013	2013	Plos One	3.234	5	0	Foreign_only	NA	No	No	Monceau, K., Cezilly, F., Moreau, J., Motreuil, S., Wattier, R., 2013. Colonisation and diversification of the Zenaida Dove (Zenaida aurita) in the Antilles: phylogeography, contemporary gene flow and morphological divergence. PLoS One 8, e82189.
Monzon-Arguello et al 2010	2010	Journal of Experimental Marine Biology and Ecology	0.953	5	0	Foreign_only	NA	No	No	Monzón-Argüello, C., Rico, C., Marco, A., López, P., López-Jurado, L.F., 2010. Genetic characterization of eastern Atlantic hawksbill turtles at a foraging group indicates major undiscovered nesting populations in the region. Journal of Experimental Marine Biology and Ecology 387, 9-14.
Mora 2008	2008	Proceedings of the Royal Society B-Biological Sciences	5.051	1	0	Foreign_only	NA	No	No	Mora, C., 2008. A clear human footprint in the coral reefs of the Caribbean. Proc Biol Sci 275, 767-773.
Mortimer et al 2007	2007	Molecular Ecology	6.494	3	0	Foreign_only	NA	No	No	Mortimer, J.A., Meylan, P.A., Donnelly, M., 2007. Whose turtles are they, anyway? Mol Ecol 16, 17-18.
Mullen et al 2012	2012	Journal of Experimental Marine Biology and Ecology	0.953	5	0	Foreign_only	NA	No	No	Mullen, S.P., Little, K., Draud, M., Brozek, J., Itzkowitz, M., 2012. Hybridization among Caribbean damselfish species correlates with habitat degradation. Journal of Experimental Marine Biology and Ecology 416-417, 221-229.
Muller et al 2006	2006	Molecular Ecology	6.494	4	2	Carib_&_Foreign	OT	Yes	Yes	Muller, F., Vaillant, A., Ba, A., Bouvet, J.-M., 2006. Isolation and characterization of microsatellite markers in Pterocarpus officinalis Jacq. Molecular Ecology Notes 6, 462-464.
Mumby 2009	2009	Coral Reefs	3.324	1	0	Foreign_only	NA	No	No	Mumby, P.J., 2009. Herbivory versus corallivory: are parrotfish good or bad for Caribbean coral reefs? Coral Reefs 28, 683-690.
Mumby & Harborne 2010	2010	Plos One	3.234	2	0	Foreign_only	NA	No	No	Mumby, P.J., Harborne, A.R., 2010. Marine reserves enhance the recovery of corals on Caribbean reefs. PLoS One 5, e8657.
Mumby et al 2006	2006	Science	33.611	14	1	Carib_&_Foreign	SS	Yes	No	Mumby, P.J., Dahlgren, C.P., Harborne, A.R., Kappel, C.V., Micheli, F., Brumbaugh, D.R., Holmes, K.E., Mendes, J.M., Broad, K., Sanchirico, J.N., Buch, K., Box, S., Stoffle, R.W., Gill, A.B., 2006. Fishing, trophic cascades, and the process of grazing on coral reefs. Science 311, 98-101.
Mumby et al 2007	2007	Nature	41.456	3	0	Foreign_only	NA	No	No	Mumby, P.J., Hastings, A., Edwards, H.J., 2007. Thresholds and the resilience of Caribbean coral reefs. Nature 450, 98-101.
Mumby et al 2008	2008	Conservation Biology	4.165	10	0	Foreign_only	NA	No	No	Mumby, P.J., Broad, K., Brumbaugh, D.R., Dahlgren, C.P., Harborne, A.R., Hastings, A., Holmes, K.E., Kappel, C.V., Micheli, F., Sanchirico, J.N., 2008. Coral reef habitats as surrogates of species, ecological functions, and ecosystem services. Conserv Biol 22, 941-951.
Murphy et al 2001	2001	Biological Conservation	3.762	6	0	Foreign_only	NA	No	No	Murphy MT, Pierce A, Shoen J, Murphy KL, Campbell JA, Hamilton DA (2001) Population structure and habitat use by overwintering neotropical migrants on a remote oceanic island. Biol Conserv 102:333-345
Muscarella et al 2011	2011	Plos One	3.234	5	0	Foreign_only	NA	No	No	Muscarella, R.A., Murray, K.L., Ortt, D., Russell, A.L., Fleming, T.H., 2011. Exploring demographic, physical, and historical explanations for the genetic structure of two lineages of Greater Antillean bats. PLoS One 6, e17704.
Nagelkerken et al 2005	2005	Hydrobiologia	2.275	5	2	Carib_&_Foreign	OT	Yes	Yes	Nagelkerken, I., Vermonden, K., Moraes, O.C.C., Debrot, A.O., Nagelkerken, W.P., 2005. Changes in Coral Reef Communities and an Associated Reef Fish Species, Cephalopholis cruentata (Lacépède), After 30 years on Curaçao (Netherlands Antilles). Hydrobiologia 549, 145-154.
Nagelkerken & Nagelkerken 2004	2004	Bulletin of Marine Science	1.306	2	1	Carib_&_Foreign	OT	Yes	Yes	Nagelkerken I, Nagelkerken WP (2004) Loss of coral cover and biodiversity on shallow Acropora and Millepora reefs after 31 years on Curacao, Netherlands Antilles. Bull Mar Sci 74:213-223
Naro-Maciel et al 2014	2014	Journal of Experimental Marine Biology and Ecology	0.953	10	1	Carib_&_Foreign	SS	Yes	No	Naro-Maciel, E., Reid, B.N., Alter, S.E., Amato, G., Bjorndal, K.A., Bolten, A.B., Martin, M., Nairn, C.J., Shamblin, B., Pineda-Catalan, O., 2014. From refugia to rookeries: Phylogeography of Atlantic green turtles. Journal of Experimental Marine Biology and Ecology 461, 306-316.
Neiber et al 2011	2011	Plos One	3.234	7	0	Foreign_only	NA	No	No	Neiber, M.T., Hartke, T.R., Stemme, T., Bergmann, A., Rust, J., Iliffe, T.M., Koenemann, S., 2011. Global biodiversity and phylogenetic evaluation of remipedia (crustacea). PLoS One 6, e19627.
Nemeth 2005	2005	Marine Ecology Progress Series	2.619	1	1	Carib_only	OT	Yes	Yes	Nemeth RS (2005) Population characteristics of a recovering US Virgin Islands red hind spawning aggregation following protection. Mar Ecol-Prog Ser 286:81-97
Newman et al 2015	2015	Journal of Animal Ecology	4.504	7	0	Foreign_only	NA	No	No	Newman, S.P., Meesters, E.H., Dryden, C.S., Williams, S.M., Sanchez, C., Mumby, P.J., Polunin, N.V., 2015. Reef flattening effects on total richness and species responses in the Caribbean. J Anim Ecol 84, 1678-1689.
Nijman 2010	2010	Caribbean Journal of Science	0.353	1	0	Foreign_only	NA	No	No	Nijman V (2010) The Importance of Small Wetlands for the Conservation of the Endemic Caribbean Coot Fulica caribaea. Caribbean Journal of Science 46:112-115
Nijman et al 2009	2009	Caribbean Journal of Science	0.353	7	1	Carib_&_Foreign	OT	Yes	No	Nijman, V., Booij, J., Flikweert, M., Aliabadian, M., de Freitas, J.A., Vonk, R., Prins, T.G., 2009. Habitat use of raptors in response to anthropogenic land use on Bonaire and Curacao, Netherlands Antilles. Caribb. J. Sci. 45, 25-29.
Noble et al 2013	2013	Plos One	3.234	4	2	Carib_&_Foreign	OT	Yes	Yes	Noble, M.M., van Laake, G., Berumen, M.L., Fulton, C.J., 2013. Community change within a Caribbean coral reef Marine Protected Area following two decades of local management. PLoS One 8, e54069.
Norghauer et al 2011	2011	Plos One	3.234	5	1	Carib_&_Foreign	SS	Yes	No	Norghauer, J.M., Martin, A.R., Mycroft, E.E., James, A., Thomas, S.C., 2011. Island invasion by a threatened tree species: evidence for natural enemy release of mahogany (Swietenia macrophylla) on Dominica, Lesser Antilles. PLoS One 6, e18790.
Ogden 2010	2010	Revista de Biologia Tropical	0.524	1	0	Foreign_only	NA	No	No	Ogden JC (2010) Marine spatial planning (MSP) A first step to ecosystem-based management (EBM) in the Wider Caribbean. Rev Biol Trop 58:71-79
Ogden & Thorpe 2002	2002	Proceedings of the National Academy of Sciences of the US of America	9.674	2	0	Foreign_only	NA	No	No	Ogden R, Thorpe RS (2002) Molecular evidence for ecological speciation in tropical habitats. Proc Natl Acad Sci U S A 99:13612-13615
Ogden & Thorpe 2002	2002	Molecular Ecology	6.494	2	0	Foreign_only	NA	No	No	Ogden R, Thorpe RS (2002) The usefulness of amplified fragment length polymorphism markers for taxon discrimination across graduated fine evolutionary levels in Caribbean Anolis lizards. Mol Ecol 11:437-445
Oppel et al 2014	2014	Bird Conservation International	1.784	5	0	Foreign_only	NA	No	No	Oppel, S., Cassini, A., Fenton, C., Daley, J., & Gray, G., 2014. Population status and trend of the critically endangered Montserrat Oriole. Bird Conservation International 24, 252.
Owen 2000	2000	Dodo	0.378	1	0	Foreign_only	NA	No	No	Owen, A., 2000. The collection of eight Montserrat Orioles Icterus oberi and their establishment at Jersey Zoo. Dodo 36, 51-61.
Pandolfi & Jackson 2006	2006	Ecology Letters	10.689	2	0	Foreign_only	NA	No	No	Pandolfi, J.M., Jackson, J.B., 2006. Ecological persistence interrupted in Caribbean coral reefs. Ecol Lett 9, 818-826.
Parashuram et al 2015	2015	Bird Conservation International	1.784	8	4	Carib_&_Foreign	OT	Yes	No	Parashuram, D., Oppel, S., Fenton, C., James, G., Daley, J., Gray, G., Collar, N.J., Dolman, P.M., 2015. The Forest Thrush Turdus lherminieri prefers mature mesic forest with dense canopy. Bird Conservation International 25, 503-513.
Parham et al 2013	2013	Molecular Phylogenetics and Evolution	3.916	7	3	Carib_&_Foreign	SS	Yes	No	Parham, J.F., Papenfuss, T.J., Dijk, P.P., Wilson, B.S., Marte, C., Schettino, L.R., Brian Simison, W., 2013. Genetic introgression and hybridization in Antillean freshwater turtles (Trachemys) revealed by coalescent analyses of mitochondrial and cloned nuclear markers. Mol Phylogenet Evol 67, 176-187.
Pawlik et al 2015	2015	Marine Ecology Progress Series	2.619	4	0	Foreign_only	NA	No	No	Pawlik, J.R., McMurray, S.E., Erwin, P., Zea, S., 2015. Trophic ecology of sponges from shallow to mesophotic depths (3 to 150 m): Comment on Pawlik et al. (2015). Marine Ecology Progress Series 527, 275-279.
Pemberton & Liu 2007	2007	Biological Control	1.635	2	0	Foreign_only	NA	No	No	Pemberton, R.W., Liu, H., 2007. Control and persistence of native Opuntia on Nevis and St. Kitts 50 years after the introduction of Cactoblastis cactorum. Biological Control 41, 272-282.
Perotto-Baldivieso et al 2009	2009	Biodiversity and Conservation	2.365	11	7	Carib_&_Foreign	OT	Yes	Yes	Perotto-Baldivieso, H.L., Meléndez-Ackerman, E., García, M.A., Leimgruber, P., Cooper, S.M., Martínez, A., Calle, P., Ramos Gonzáles, O.M., Quiñones, M., Christen, C.A., Pons, G., 2009. Spatial distribution, connectivity, and the influence of scale: habitat availability for the endangered Mona Island rock iguana. Biodiversity and Conservation 18, 905-917.
Perry et al 2015	2015	Global Change Biology	8.044	7	0	Foreign_only	NA	No	No	Perry, C.T., Steneck, R.S., Murphy, G.N., Kench, P.S., Edinger, E.N., Smithers, S.G., Mumby, P.J., 2015. Regional-scale dominance of non-framework building corals on Caribbean reefs affects carbonate production and future reef growth. Glob Chang Biol 21, 1153-1164.
Pesic et al 2014	2014	Zookeys	0.933	4	2	Carib_&_Foreign	OT	Yes	Yes	Pesic, V., Chatterjee, T., Alfaro, M., Schizas, N.V., 2014. A new species of Litarachna (Acari, Hydrachnidia, Pontarachnidae) from a Caribbean mesophotic coral ecosystem. Zookeys 10.3897/zookeys.425.8110, 89-97.
Petersen et al 2004	2004	Zoo Biology	0.831	4	2	Carib_&_Foreign	OT	Yes	Yes	Petersen, D., Laterveer, M.l., Bergen, D.v., Kuenen, M., 2004. Transportation techniques for massive scleractinian corals. Zoo Biology 23, 165-176.
Petersen et al 2005	2005	Coral Reefs	3.324	4	1	Carib_&_Foreign	OT	Yes	Yes	Petersen, D., Hatta, M., Laterveer, M., Bergen, D.v., 2005. Ex situ transportation of coral larvae for research, conservation, and aquaculture. Coral Reefs 24, 510-513.
Petit et al 2006	2006	Animal Conservation	2.852	3	2	Carib_&_Foreign	OT	Yes	Yes	Petit, S., Rojer, A., Pors, L., 2006. Surveying bats for conservation: the status of cave-dwelling bats on Curacao from 1993 to 2003. Animal Conservation 9, 207-217.
Petrakovsky et al 2014	2014	International Journal of Environmental Resaerch and Public Health	2.063	5	0	Foreign_only	NA	No	No	Petrakovsky, J., Bianchi, A., Fisun, H., Najera-Aguilar, P., Pereira, M.M., 2014. Animal leptospirosis in Latin America and the Caribbean countries: reported outbreaks and literature review (2002-2014). Int J Environ Res Public Health 11, 10770-10789.
Petrescu et al 2014	2014	Zootaxa	0.906	3	1	Carib_&_Foreign	OT	Yes	Yes	Petrescu, I., Chatterjee, T., Schizas, N.V., 2014. Three new Nannastacidae (Crustacea: Cumacea) species from a Caribbean mesophotic ecosystem. Zootaxa 3765, 360-370.
Pittman & Brown 2011	2011	Plos One	3.234	2	1	Carib_&_Foreign	OT	Yes	Yes	Pittman, S.J., Brown, K.A., 2011. Multi-scale approach for predicting fish species distributions across coral reef seascapes. PLoS One 6, e20583.
Platenberg & Harvey 2010	2010	Herpetological Conservation and Biology	0.595	2	1	Carib_&_Foreign	OT	Yes	Yes	Platenberg RJ, Harvey DS (2010) Endangered species and land use conflicts: a case study of the Virgin Islands Boa (Epicrates granti). Herpetol Conserv Biol 5:548-554
Pohle et al 2011	2011	Plos One	3.234	16	0	Foreign_only	NA	No	No	Pohle, G., Iken, K., Clarke, K.R., Trott, T., Konar, B., Cruz-Motta, J.J., Wong, M., Benedetti-Cecchi, L., Mead, A., Miloslavich, P., Mieszkowska, N., Milne, R., Tamburello, L., Knowlton, A., Kimani, E., Shirayama, Y., 2011. Aspects of benthic decapod diversity and distribution from rocky nearshore habitat at geographically widely dispersed sites. PLoS One 6, e18606.
Polato et al 2011	2011	Plos One	3.234	3	0	Foreign_only	NA	No	No	Polato, N.R., Vera, J.C., Baums, I.B., 2011. Gene discovery in the threatened elkhorn coral: 454 sequencing of the Acropora palmata transcriptome. PLoS One 6, e28634.
Pollnac et al 2010	2010	Proceedings of the National Academy of Sciences of the US of America	9.674	8	0	Foreign_only	NA	No	No	Pollnac, R., Christie, P., Cinner, J.E., Dalton, T., Daw, T.M., Forrester, G.E., Graham, N.A., McClanahan, T.R., 2010. Marine reserves as linked social-ecological systems. Proc Natl Acad Sci U S A 107, 18262-18265.
Porto-Hannes & Lasker 2013	2013	Marine Biodiversity	1.104	2	0	Foreign_only	NA	No	No	Porto-Hannes, I., & Lasker, H. R., 2013. Isolation and characterization of 7 microsatellite loci in the Caribbean gorgonian Antillogorgia elisabethae. Marine Biodiversity 43, 273-277.
Poupin & Lemaitre 2014	2014	Zoosystema	0.692	2	0	Foreign_only	NA	No	No	Poupin, J., Lemaitre, R., 2014. Porcellanid crabs from Guadeloupe Island (Crustacea, Decapoda, Anomura), with an updated list of species from the Lesser Antilles. Zoosystema 36, 5-27.
Powell & Henderson 2005	2005	Caribbean Journal of Science	0.353	2	0	Foreign_only	NA	No	No	Powell R, Henderson RW (2005) A new species of Gonatodes (Squamata : Gekkonidae) from the West Indies. Caribbean Journal of Science 41:709-715
Pratt et al 2007	2007	Journal of Aquatic Plant Mangement	0.118	4	0	Foreign_only	NA	No	No	Pratt PD, Rayamajhi MB, Silvers CS, Ferriter AP (2007) Naturalization and biomass allocation of the invasive tree Melaleuca quinquenervia in wetlands of the Bahamas. Journal of Aquatic Plant Management 45:8-16
Precht et al 2010	2010	Plos One	3.234	4	0	Foreign_only	NA	No	No	Precht, W.F., Aronson, R.B., Moody, R.M., Kaufman, L., 2010. Changing patterns of microhabitat utilization by the threespot damselfish, Stegastes planifrons, on Caribbean reefs. PLoS One 5, e10835.
Prins et al 2009	2009	Ardea	0.646	4	1	Carib_&_Foreign	OT	Yes	No	Prins, T.G., Reuter, J.H., Debrot, A.O., Wattel, J., Nijman, V., 2009. Checklist of the Birds of Aruba, Curaçao and Bonaire, South Caribbean. Ardea 97, 137-268.
Purcell et al 2006	2006	Philosophical Transactions of the Royal Society B-Biological Sciences	7.055	4	0	Foreign_only	NA	No	No	Purcell, J.F., Cowen, R.K., Hughes, C.R., Williams, D.A., 2006. Weak genetic structure indicates strong dispersal limits: a tale of two coral reef fish. Proc Biol Sci 273, 1483-1490.
Quéré et al 2015	2015	Coral Reefs	3.324	3	1	Carib_&_Foreign	OT	Yes	Yes	Quéré, G., Steneck, R.S., Nugues, M.M., 2015. Spatiotemporal and species-specific patterns of diseases affecting crustose coralline algae in Curaçao. Coral Reefs 34, 259-273.
Quijano-Abril et al 2014	2014	Revista Mexicana de Biodiversidad	0.459	3	0	Foreign_only	NA	No	No	Quijano-Abril, M.A., Gregorio Mejía-Franco, F., Callejas-Posada, R., 2014. Análisis panbiogeográfico de Enckea (Piperaceae), un pequeño clado de bosques secos en la filogenia de un gran género de bosques húmedos. Revista Mexicana de Biodiversidad 85, 98-107.
Quinn & Kojis 2005	2005	Revista de Biologia Tropical	0.524	2	2	Carib_only	SS+OT	Yes	Yes	Quinn, N.J., Kojis, B.L., 2005. Patterns of sexual recruitment of acroporid coral populations on the West Fore Reef at Discovery Bay, Jamaica. Rev. Biol. Trop. 53, 83-90.
Rabosky & Glor 2010	2010	Proceedings of the National Academy of Sciences of the US of America	9.674	2	0	Foreign_only	NA	No	No	Rabosky, D.L., Glor, R.E., 2010. Equilibrium speciation dynamics in a model adaptive radiation of island lizards. Proc Natl Acad Sci U S A 107, 22178-22183.
Ralisback & Johnson 2014	2014	Proceedings of the National Academy of Sciences of the US of America	9.674	2	0	Foreign_only	NA	No	No	Railsback, S.F., Johnson, M.D., 2014. Effects of land use on bird populations and pest control services on coffee farms. Proc Natl Acad Sci U S A 111, 6109-6114.
Ramirez-Barahona et al 2011	2011	Biodiversity and Conservation	2.365	3	0	Foreign_only	NA	No	No	Ramírez-Barahona, S., Luna-Vega, I., Tejero-Díez, D., 2011. Species richness, endemism, and conservation of American tree ferns (Cyatheales). Biodiversity and Conservation 20, 59-72.
Ramos-Scharron & MacDonald 2007	2007	Journal of Environment Management	2.723	2	0	Foreign_only	NA	No	No	Ramos-Scharron, C.E., Macdonald, L.H., 2007. Development and application of a GIS-based sediment budget model. J Environ Manage 84, 157-172.
Rawlins & Miller 2008	2008	Annals of Carnegie Museum	0.724	2	0	Foreign_only	NA	No	No	Rawlins, J.E., Miller, J.S., 2008. Dioptine Moths of the Caribbean Region: Description of Two New Genera with Notes on Biology and Biogeography (Lepidoptera: Notodontidae: Dioptinae). Annals of Carnegie Museum 76, 203-225.
Rawlinson 2008	2008	Marine Biology	2.391	1	0	Foreign_only	NA	No	No	Rawlinson, K.A., 2008. Biodiversity of coastal polyclad flatworm assemblages in the wider Caribbean. Marine Biology 153, 769-778.
Reeves 2002	2002	Mammal Review	4.256	1	0	Foreign_only	NA	No	No	Reeves RR (2002) The origins and character of 'aboriginal subsistence' whaling: a global review. Mammal Review 32:71-106
Revuelta et al 2012	2012	Oryx	1.849	6	2	Carib_&_Foreign	SS	Yes	No	Revuelta, O., León, Y.M., Feliz, P., Godley, B.J., Raga, J.A., Tomás, J., 2012. Protected areas host important remnants of marine turtle nesting stocks in the Dominican Republic. Oryx 46, 348-358.
Revuelta et al 2015	2015	Endangered Species Research	NA	6	1	Carib_&_Foreign	SS	Yes	No	Revuelta, O., Hawkes, L., León, Y.M., Godley, B.J., Raga, J.A., Tomás, J., 2015. Evaluating the importance of Marine Protected Areas for the conservation of hawksbill turtles Eretmochelys imbricata nesting in the Dominican Republic. Endangered Species Research 27, 169-180.
Reynolds et al 2011	2011	Herpetologica	1.14	3	0	Foreign_only	NA	No	No	Reynolds, R.G., Gerber, G.P., Fitzpatrick, B.M., 2011. Unexpected Shallow Genetic Divergence in Turks Island Boas (Epicrates c. chrysogaster) Reveals Single Evolutionarily Significant Unit for Conservation. Herpetologica 67, 477-486.
Reynolds et al 2012	2012	Conservation Genetics	2.185	3	0	Foreign_only	NA	No	No	Reynolds, R.G., Niemiller, M.L., Fitzpatrick, B.M., 2012. Genetic analysis of an endemic archipelagic lizard reveals sympatric cryptic lineages and taxonomic discordance. Conservation Genetics 13, 953-963.
Reynolds et al 2013	2013	Molecular Phylogenetics and Evolution	3.916	6	1	Carib_&_Foreign	OT	Yes	No	Reynolds, R.G., Niemiller, M.L., Hedges, S.B., Dornburg, A., Puente-Rolon, A.R., Revell, L.J., 2013. Molecular phylogeny and historical biogeography of West Indian boid snakes (Chilabothrus). Mol Phylogenet Evol 68, 461-470.
Rice et al 2007	2007	The Auk	1.864	5	1	Carib_&_Foreign	OT	Yes	Yes	Rice, S.M., Collazo, J.A., Alldredge, M.W., Harrington, B.A., Lewis, A.R., 2007. Local Annual Survival and Seasonal Residency Rates of Semipalmated Sandpipers (Calidris Pusilla) in Puerto Rico. The Auk 124.
Rice et al 2012	2012	Bulletin of Marine Science	1.306	4	0	Foreign_only	NA	No	No	Rice, P.H., Serafy, J.E., Snodgrass, D., Prince, E.D., 2012. Performance of Non-Offset and 10° Offset 18/0 Circle Hooks in the United States Pelagic Longline Fishery. Bulletin of Marine Science 88, 571-587.
Richards et al 2012	2012	Biodiversity and Conservation	2.365	3	0	Foreign_only	NA	No	No	Richards, V.P., Stanhope, M.J., Shivji, M.S., 2012. Island endemism, morphological stasis, and possible cryptic speciation in two coral reef, commensal Leucothoid amphipod species throughout Florida and the Caribbean. Biodiversity and Conservation 21, 343-361.
Richardson & Cowen 2004	2004	Marine Ecology Progress Series	2.619	2	0	Foreign_only	NA	No	No	Richardson, D. E., Cowen, R. K., 2004. Diversity of leptocephalus larvae around the island of Barbados (West Indies): relevance to regional distributions. Marine Ecology Progress Series 282, 271-284
Richardson et al 2009	2009	Chelonian Conservation and Biology	0.738	16	8	Carib_&_Foreign	OT	Yes	No	Richardson, P.B., Bruford, M.W., Calosso, M.C., Campbell, L.M., Clerveaux, W., Formia, A., Godley, B.J., Henderson, A.C., McClellan, K., Newman, S., Parsons, K., Pepper, M., Ranger, S., Silver, J.J., Slade, L., Broderick, A.C., 2009. Marine Turtles in the Turks and Caicos Islands: Remnant Rookeries, Regionally Significant Foraging Stocks, and a Major Turtle Fishery. Chelonian Conservation and Bio…
Ricklefs & Bermingham 2004	2004	Evolution	4.612	2	0	Foreign_only	NA	No	No	Ricklefs, R. E., Bermingham, E., 2004. Application of Johnson et al.'s speciation threshold model to apparent colonization times of island biotas. Evolution 58, 1664-1673
Ricklefs & Bermingham 2007	2007	The American Naturalist	3.832	2	0	Foreign_only	NA	No	No	Ricklefs, R.E., Bermingham, E., 2007. The causes of evolutionary radiations in archipelagoes: passerine birds in the Lesser Antilles. Am Nat 169, 285-297.
Ricklefs & Bermingham 2008	2008	Philosophical Transactions of the Royal Society B-Biological Sciences	5.051	2	0	Foreign_only	NA	No	No	Ricklefs, R., Bermingham, E., 2008. The West Indies as a laboratory of biogeography and evolution. Philos Trans R Soc Lond B Biol Sci 363, 2393-2413.
Rios-Lopez 2008	2008	Amphibia-Reptilia	0.887	1	1	Carib_only	OT	Yes	Yes	Rios-Lopez N (2008) Effects of increased salinity on tadpoles of two anurans from a Caribbean coastal wetland in relation to their natural abundance. Amphibia-Reptilia 29:7-18
Rivera-Ocasio et al 2006	2006	Conservation Genetics	2.185	3	3	Carib_only	OT	Yes	Yes	Rivera-Ocasio, E., Aide, T.M., McMillan, W.O., 2006. The influence of spatial scale on the genetic structure of a widespread tropical wetland tree, Pterocarpus officinalis (Fabaceae). Conservation Genetics 7, 251-266.
Rocha 2004	2004	Copeia	1.034	1	0	Foreign_only	NA	No	No	Rocha, L.A., 2004. Mitochondrial DNA and Color Pattern Variation in Three Western Atlantic Halichoeres (Labridae), with the Revalidation of Two Species. Copeia 2004, 770-782.
Rocha et al 2008	2008	Molecular Phylogenetics and Evolution	3.916	4	0	Foreign_only	NA	No	No	Rocha, L.A., Lindeman, K.C., Rocha, C.R., Lessios, H.A., 2008. Historical biogeography and speciation in the reef fish genus Haemulon (Teleostei: Haemulidae). Mol Phylogenet Evol 48, 918-928.
Rocha et al 2008	2008	BMC Evolutionary Biology	3.368	4	0	Foreign_only	NA	No	No	Rocha, L.A., Rocha, C.R., Robertson, D.R., Bowen, B.W., 2008. Comparative phylogeography of Atlantic reef fishes indicates both origin and accumulation of diversity in the Caribbean. BMC Evol Biol 8, 157.
Rodder 2009	2009	Tropical Zoology	0.84	1	0	Foreign_only	NA	No	No	Rodder D (2009) Human Footprint, facilitated jump dispersal, and the potential distribution of the invasive Eleutherodactylus johnstonei Barbour 1914 (Anura Eleutherodactylidae). Tropical Zoology 22:205-217
Rodriguez-Duran & Otero 2011	2011	Acta Chiropterologica	1.133	2	2	Carib_only	OT	Yes	Yes	Rodríguez-Durán, A., Otero, W., 2011. Species Richness and Diversity of a West Indian Bat Assemblage in a Fragmented Ecosystem. Acta Chiropterologica 13, 439-445.
Rodriguez-Pena et al 2014	2014	Plant Systematics and Evolution	1.422	10	4	Carib_&_Foreign	SS	Yes	No	Rodríguez-Peña, R.A., Jestrow, B., Cinea, W., Veloz, A., Jiménez-Rodríguez, F., García, R., Meerow, A.W., Griffith, M.P., Maunder, M., Francisco-Ortega, J., 2014. Conservation and genetics of two Critically Endangered Hispaniolan palms: genetic erosion of Pseudophoenix lediniana in contrast to P. ekmanii. Plant Systematics and Evolution 300, 2019-2027.
Rodriguez-Robles et al 2008	2008	Molecular Phylogenetics and Evolution	3.916	3	0	Foreign_only	NA	No	No	Rodriguez-Robles, J.A., Jezkova, T., Leal, M., 2008. Genetic structuring in the threatened "Lagartijo del Bosque Seco" (Anolis cooki) from Puerto Rico. Mol Phylogenet Evol 46, 503-514.
Rodriguez-Robles et al 2015	2015	Molecular Phylogenetics and Evolution	3.916	5	1	Carib_&_Foreign	OT	Yes	Yes	Rodriguez-Robles, J.A., Jezkova, T., Fujita, M.K., Tolson, P.J., Garcia, M.A., 2015. Genetic divergence and diversity in the Mona and Virgin Islands Boas, Chilabothrus monensis (Epicrates monensis) (Serpentes: Boidae), West Indian snakes of special conservation concern. Mol Phylogenet Evol 88, 144-153.
Roff & Mumby 2012	2012	Trends in Ecology and Evolution	16.196	2	0	Foreign_only	NA	No	No	Roff, G., Mumby, P.J., 2012. Global disparity in the resilience of coral reefs. Trends Ecol Evol 27, 404-413.
Rogers 2009	2009	Proceedings of the Royal Society B-Biological Sciences	5.051	1	1	Carib_only	OT	Yes	Yes	Rogers, C., 2009. Coral bleaching and disease should not be underestimated as causes of Caribbean coral reef decline. Proc Biol Sci 276, 197-198
Rojas-Sandoval & Acevedo-Rodriguez 2015	2015	Biological Invasions	2.586	2	0	Foreign_only	NA	No	No	Rojas-Sandoval, J., Acevedo-Rodríguez, P., 2015. Naturalization and invasion of alien plants in Puerto Rico and the Virgin Islands. Biological Invasions 17, 149-163.
Romero et al 2002	2002	Mammalia	0.681	4	0	Foreign_only	NA	No	No	Romero A, Hayford KT, Romero A, Romero J (2002) The marine mammals of Grenada, WI, and their conservation status. Mammalia 66:479-494
Rosas et al 2008	2008	Molecular Ecology Resources	3.712	6	6	Carib_only	OT	Yes	Yes	Rosas, K.G., Perez-Buitrago, N., Acevedo, J.P., Martinez, N., Funk, S.M., McMillan, W.O., 2008. Development and characterization of 11 microsatellite loci for the Mona Island iguana (Cyclura cornuta stejnegeri). Mol Ecol Resour 8, 825-827.
Rosenberg & Korsmo 2001	2001	Journal of Environment Management	2.723	2	0	Foreign_only	NA	No	No	Rosenberg, J., Korsmo, F.L., 2001. Local participation, international politics, and the environment: the World Bank and the Grenada Dove. J Environ Manage 62, 283-300.
Rowell et al 2015	2015	Marine Ecology Progress Series	2.619	4	4	Carib_only	OT	Yes	Yes	Rowell, T.J., Nemeth, R.S., Schärer, M.T., Appeldoorn, R.S., 2015. Fish sound production and acoustic telemetry reveal behaviors and spatial patterns associated with spawning aggregations of two Caribbean groupers. Marine Ecology Progress Series 518, 239-254.
Ruber et al 2003	2003	Evolution	4.612	3	0	Foreign_only	NA	No	No	Ruber, L., Van Tassell, J. L., Zardoya, R., 2003. Rapid speciation and ecological divergence in the American seven-spined gobies (Gobiidae, Gobiosomatini) inferred from a molecular phylogeny. Evolution 57, 1594-1598
Ruiz & Brescovit 2013	2013	Zootaxa	0.906	2	0	Foreign_only	NA	No	No	Ruiz, A.S., Brescovit, A.D., 2013. The genus Loxosceles Heineken & Lowe (Araneae: Sicariidae) in Cuba and Hispaniola, West Indies. Zootaxa 3731, 212-222.
Ruiz-Moreno et al 2012	2012	Diseases of Aquatic Organisms	1.752	10	1	Carib_&_Foreign	OT	Yes	No	Ruiz-Moreno, D., Willis, B.L., Page, A.C., Weil, E., Croquer, A., Vargas-Angel, B., Jordan-Garza, A.G., Jordan-Dahlgren, E., Raymundo, L., Harvell, C.D., 2012. Global coral disease prevalence associated with sea temperature anomalies and local factors. Dis Aquat Organ 100, 249-261.
Russello & Amato 2005	2005	Molecular Phylogenetics and Evolution	3.916	2	0	Foreign_only	NA	No	No	Russello, M.A., Amato, G., 2005. A molecular phylogeny of Amazona: implications for Neotropical parrot biogeography, taxonomy, and conservation. Molecular Phylogenetics and Evolution 30, 421-437.
Saillant et al 2012	2012	Fisheries Management and Ecology	1.76	4	0	Foreign_only	NA	No	No	Saillant, E.A., Renshaw, M.A., Cummings, N.J., Gold, J.R., 2012. Conservation genetics and management of yellowtail snapper, Ocyurus chrysurus, in the US Caribbean and South Florida. Fisheries Management and Ecology 19, 301-312.
Santiago-Valentin et al 2015	2015	Taxon	3.299	3	1	Carib_&_Foreign	OT	Yes	Yes	Santiago-Valentín, E., Sánchez-Pinto, L., Francisco-Ortega, J., 2015. Domingo Bello y Espinosa (1817–1884) and the new taxa published in his Apuntes para la flora de Puerto-Rico. Taxon 64, 323-349.
Santos 2014	2014	Molecular Ecology	6.494	1	0	Foreign_only	NA	No	No	Santos, S. R., 2014. Expanding the population genetic perspective of cnidarian-Symbiodinium symbioses. Mol Ecol 23:4185-4187
Santos et al 2004	2004	Molecular Ecology	6.494	4	0	Foreign_only	NA	No	No	Santos SR, Shearer TL, Hannes AR, Coffroth MA (2004) Fine-scale diversity and specificity in the most prevalent lineage of symbiotic dinoflagellates (Symbiodinium, Dinophyceae) of the Caribbean. Mol Ecol 13:459-469
Santos et al 2006	2006	Chelonian Conservation and Biology	0.738	4	0	Foreign_only	NA	No	No	Santos, K.C., Tague, C., Alberts, A.C., Franklin, J., 2006. Sea Turtle Nesting Habitat on the US Naval Station, Guantanamo Bay, Cuba: A Comparison of Habitat Suitability Index Models. Chelonian Conservation and Biology 5, 175-187.
Scharer et al 2012	2012	Copeia	1.034	6	4	Carib_&_Foreign	OT	Yes	Yes	Schärer, M.T., Nemeth, M.I., Mann, D., Locascio, J., Appeldoorn, R.S., Rowell, T.J., 2012. Sound Production and Reproductive Behavior of Yellowfin Grouper, Mycteroperca venenosa (Serranidae) at a Spawning Aggregation. Copeia 2012, 135-144.
Scharer-Umpierre et al 2014	2014	Marine Managed Areas and Fisheries	3.483	9	9	Carib_only	OT	Yes	Yes	Scharer-Umpierre, M.T., Mateos-Molina, D., Appeldoorn, R., Bejarano, I., Hernandez-Delgado, E.A., Nemeth, R.S., Nemeth, M.I., Valdes-Pizzini, M., Smith, T.B., 2014. Marine managed areas and associated fisheries in the US Caribbean. Adv Mar Biol 69, 129-152.
Selig & Bruno 2010	2010	Plos One	3.234	2	0	Foreign_only	NA	No	No	Selig, E.R., Bruno, J.F., 2010. A global analysis of the effectiveness of marine protected areas in preventing coral loss. PLoS One 5, e9278.
Sellas et al 2015	2015	Journal of Heredity	2.088	6	1	Carib_&_Foreign	SS	Yes	No	Sellas, A.B., Bassos-Hull, K., Perez-Jimenez, J.C., Angulo-Valdes, J.A., Bernal, M.A., Hueter, R.E., 2015. Population Structure and Seasonal Migration of the Spotted Eagle Ray, Aetobatus narinari. J Hered 106, 266-275.
Semmens et al 2010	2010	Plos One	3.234	3	0	Foreign_only	NA	No	No	Semmens, B. X., Auster, P. J., Paddack, M. J., 2010. Using Ecological Null Models to Assess the Potential for Marine Protected Area Networks to Protect Biodiversity. PLoS ONE 5, e8895. doi:10.1371/journal.pone.0008895
Senna et al 2014	2014	Zootaxa	0.906	4	1	Carib_&_Foreign	OT	Yes	Yes	Senna, A.R., Sorrentino, R., Chatterjee, T., Schizas, N.V., 2014. A new species of Boca Lowry & Stoddart, 1997 (Amphipoda: Lysianassoidea: Aristiidae) from a mesophotic coral ecosystem off Puerto Rico, Caribbean Sea. Zootaxa 3884, 429-436.
Serrano et al 2014	2014	Molecular Ecology	6.494	8	1	Carib_&_Foreign	OT	Yes	No	Serrano, X., Baums, I.B., O'Reilly, K., Smith, T.B., Jones, R.J., Shearer, T.L., Nunes, F.L., Baker, A.C., 2014. Geographic differences in vertical connectivity in the Caribbean coral Montastraea cavernosa despite high levels of horizontal connectivity at shallow depths. Mol Ecol 23, 4226-4240.
Shamblin et al 2012	2012	Marine Ecology Progress Series	2.619	20	0	Foreign_only	NA	No	No	Shamblin, B.M., Bolten, A.B., Bjorndal, K.A., Dutton, P.H., Nielsen, J.T., Abreu-Grobois, F.A., Reich, K.J., Witherington, B.E., Bagley, D.A., Ehrhart, L.M., Tucker, A.D., Addison, D.S., Arenas, A., Johnson, C., Carthy, R.R., Lamont, M.M., Dodd, M.G., Gaines, M.S., LaCasella, E., Nairn, C.J., 2012. Expanded mitochondrial control region sequences increase resolution of stock structure among North …
Shamblin et al 2012	2012	Molecular Ecology	6.494	7	2	Carib_&_Foreign	OT	Yes	No	Shamblin, B.M., Bjorndal, K.A., Bolten, A.B., Hillis-Starr, Z.M., Lundgren, I., Naro-Maciel, E., Nairn, C.J., 2012. Mitogenomic sequences better resolve stock structure of southern Greater Caribbean green turtle rookeries. Mol Ecol 21, 2330-2340.
Shearer et al 2009	2009	Coral Reefs	3.324	3	0	Foreign_only	NA	No	No	Shearer, T.L., Porto, I., Zubillaga, A.L., 2009. Restoration of coral populations in light of genetic diversity estimates. Coral Reefs 28, 727-733.
Sherman 2000	2000	Marine Pollution Bulletin	2.991	1	0	Foreign_only	NA	No	No	Sherman BH (2000) Marine ecosystem health as an expression of morbidity, mortality and disease events. Mar Pollut Bull 41:232-254
Shi et al 2005	2005	Conservation Biology	4.165	5	0	Foreign_only	NA	No	No	Shi, H.U.A., Singh, A., Kant, S., Zhu, Z., Waller, E., 2005. Integrating Habitat Status, Human Population Pressure, and Protection Status into Biodiversity Conservation Priority Setting. Conservation Biology 19, 1273-1285.
Silva 2008	2008	Brazilian Journal of Biology	0.783	1	0	Foreign_only	NA	No	No	Silva, W. M., 2008. Diversity and distribution of the free-living freshwater Cyclopoida (Copepoda: Crustacea) in the Neotropics. Brazilian Journal of Biology 68, 1099-1106
Sims et al 2008	2008	Biological Conservation	3.762	4	0	Foreign_only	NA	No	No	Sims, M., Bjorkland, R., Mason, P., Crowder, L.B., 2008. Statistical power and sea turtle nesting beach surveys: How long and when? Biological Conservation 141, 2921-2931.
Siquieros-Delgado et al 2011	2011	Revista Mexicana de Biodiversidad	0.459	5	3	Carib_&_Foreign	SS	Yes	Yes	Siqueiros-Delgado, M. E., Oviedo-Prieto, R., Cerros-Tlatilpa, R., del Risco-Villalobos, R., Ventosa-Rodriguez, I., 2011. Rediscovery of Bouteloua vaneedenii (Gramineae: Chloridoideae): endemic species from the West Indies. Revista Mexicana de Biodiversidad 82, 1328-1332
Slate & Stevenson 2007	2007	Diatom Research	1.746	2	0	Foreign_only	NA	No	No	Slate, J. E., & Stevenson, R. J., 2007. The diatom flora of phosphorus-enriched and unenriched sites in an Everglades marsh. Diatom Research 22, 355-386
Slattery & Lesser 2015	2015	Marine Ecology Progress Series	2.619	2	0	Foreign_only	NA	No	No	Slattery, M., Lesser, M. P., 2015. Trophic ecology of sponges from shallow to mesophotic depths (3 to 150 m): Comment on Pawlik et al. (2015). Marine Ecology Progress Series 527, 275-279
Slattery et al 2013	2013	Marine Ecology Progress Series	2.619	4	0	Foreign_only	NA	No	No	Slattery, M., Gochfeld, D.J., Easson, C.G., O’Donahue, L.R.K., 2013. Facilitation of coral reef biodiversity and health by cave sponge communities. Marine Ecology Progress Series 476, 71-86.
Smith & Kwak 2014	2014	Journal of Fish Biology	1.658	2	0	Foreign_only	NA	No	No	Smith, W.E., Kwak, T.J., 2014. A capture-recapture model of amphidromous fish dispersal. J Fish Biol 84, 897-912.
Smith et al 2008	2008	Aquatic Conservation- Marine and Freshwater Ecosystems	2.136	3	1	Carib_&_Foreign	OT	Yes	No	Smith, K.L., Corujo Flores, I., Pringle, C.M., 2008. A comparison of current and historical fish assemblages in a Caribbean island estuary: conservation value of historical data. Aquatic Conservation: Marine and Freshwater Ecosystems 18, 993-1004.
Smith et al 2010	2010	Coral Reefs	3.324	7	7	Carib_only	OT	Yes	Yes	Smith, T.B., Blondeau, J., Nemeth, R.S., Pittman, S.J., Calnan, J.M., Kadison, E., Gass, J., 2010. Benthic structure and cryptic mortality in a Caribbean mesophotic coral reef bank system, the Hind Bank Marine Conservation District, U.S. Virgin Islands. Coral Reefs 29, 289-308.
Soanes et al 2015	2015	Bird Conservation International	1.784	6	1	Carib_&_Foreign	OT	Yes	No	Soanes, L.M., Bright, J.A., Bolton, M., Millett, J., Mukhida, F., Green, J.A., 2015. Foraging behaviour of Brown Boobies Sula leucogaster in Anguilla, Lesser Antilles: Preliminary identification of at-sea distribution using a time-in-area approach. Bird Conservation International 25, 87-96.
Soffer et al 2014	2014	ISME Journal	9.302	5	2	Carib_&_Foreign	OT	Yes	No	Soffer, N., Brandt, M.E., Correa, A.M., Smith, T.B., Thurber, R.V., 2014. Potential role of viruses in white plague coral disease. ISME J 8, 271-283.
Song et al 2014	2014	Environmental Microbiology Reports	3.293	5	0	Foreign_only	NA	No	No	Song, B., Buckner, C.T., Hembury, D.J., Mills, R.A., Palmer, M.R., 2014. Impact of volcanic ash on anammox communities in deep sea sediments. Environ Microbiol Rep 6, 159-166.
Soto-Centeno et al 2015	2015	American Museum Novitates	2.186	3	0	Foreign_only	NA	No	No	Soto-Centeno, J. A., O'Brien, M., Simmons, N. B., 2015. The importance of late Quaternary climate change and karst on distributions of Caribbean mormoopid bats. American Museum Novitates 3847, 1-32
Speed et al 2010	2010	Marine Ecology Progress Series	2.619	4	0	Foreign_only	NA	No	No	Speed, C.W., Field, I.C., Meekan, M.G., Bradshaw, C.J.A., 2010. Complexities of coastal shark movements and their implications for management. Marine Ecology Progress Series 408, 275-293.
Stahala 2008	2008	Ornitologia Neotropical	0.309	1	0	Foreign_only	NA	No	No	Stahala, C., 2008. Seasonal movements of the Bahama Parrot (Amazona leucocephala bahamensis)between pine and hardwood forests: Implications for habitat conservation. Ornitologia Neotropical 19, 165-171.
Starostova et al 2010	2010	Amphibia-Reptilia	0.887	3	0	Foreign_only	NA	No	No	Starostova Z, Rehak I, Frynta D (2010) New haplotypes of Cyclura nubila nubila from Cuba changed the phylogenetic tree of rock-iguanas: a challenge for conservation strategies? Amphibia-Reptilia 31:134-143
Steadman et al 2015	2015	Proceedings of the National Academy of Sciences of the US of America	9.674	7	2	Carib_&_Foreign	SS	Yes	No	Steadman, D.W., Albury, N.A., Kakuk, B., Mead, J.I., Soto-Centeno, J.A., Singleton, H.M., Franklin, J., 2015. Vertebrate community on an ice-age Caribbean island. Proc Natl Acad Sci U S A 112, E5963-5971.
Steiner 2008	2008	Annals of Carnegie Museum	0.724	1	0	Foreign_only	NA	No	No	Steiner, W.E., 2008. Ground beetles (Coleoptera: Carabidae) of Navassa Island, West Indies. Annals of Carnegie Museum 77, 129-134.
Steiner & Willette 2010	2010	Revista de Biologia Tropical	0.524	2	2	Carib_only	SS	Yes	Yes	Steiner SCC, Willette DA (2010) Distribution and size of benthic marine habitats in Dominica, Lesser Antilles. Rev Biol Trop 58:589-602
Steneck 2006	2006	Science	33.611	1	0	Foreign_only	NA	No	No	Steneck, R. S., 2006. Staying Connected in a Turbulent World. Science 311, 480-481
Stenson et al 2004	2004	Molecular Phylogenetics and Evolution	3.916	3	0	Foreign_only	NA	No	No	Stenson, A. G., Thorpe, R. S., Malhotra, A., 2004. Evolutionary differentiation of bimaculatus group anoles based on analyses of mtDNA and microsatellite data. Molecular Phylogenetics and Evolution 32, 1–10
Stern et al 2010	2010	Plos One	3.234	13	0	Foreign_only	NA	No	No	Stern, R.F., Horak, A., Andrew, R.L., Coffroth, M.A., Andersen, R.A., Kupper, F.C., Jameson, I., Hoppenrath, M., Veron, B., Kasai, F., Brand, J., James, E.R., Keeling, P.J., 2010. Environmental barcoding reveals massive dinoflagellate diversity in marine environments. PLoS One 5, e13991.
Stevens & Oslon 2013	2013	Coral Reefs	3.324	2	0	Foreign_only	NA	No	No	Stevens, J.L., Olson, J.B., 2013. Invasive lionfish harbor a different external bacterial community than native Bahamian fishes. Coral Reefs 32, 1113-1121.
Stockhausen & Lipcius 2001	2001	Marine and Freshwater Research	1.474	2	0	Foreign_only	NA	No	No	Stockhausen WT, Lipcius RN (2001) Single large or several small marine reserves for the Caribbean spiny lobster? Marine and Freshwater Research 52:1605-1614
Stoner & Ray-Culp 2000	2000	Marine Ecology Progress Series	2.619	2	0	Foreign_only	NA	No	No	Stoner AW, Ray-Culp M (2000) Evidence for Allee effects in an over-harvested marine gastropod: density-dependent mating and egg production. Mar Ecol-Prog Ser 202:297-302
Strickland-Constable et al 2010	2010	Taxon	3.299	5	0	Foreign_only	NA	No	No	Strickland-Constable R, Schneider H, Ansell SW, Russell SJ, Knapp S (2010) Species identity in the Solanum bahamense species group (Solanaceae, Solanum subgenus Leptostemonum). Taxon 59:209-226
Stringell et al 2015	2015	Biodiversity and Conservation	2.365	8	2	Carib_&_Foreign	OT	Yes	No	Stringell, T.B., Clerveaux, W.V., Godley, B.J., Phillips, Q., Ranger, S., Richardson, P.B., Sanghera, A., Broderick, A.C., 2015. Protecting the breeders: research informs legislative change in a marine turtle fishery. Biodiversity and Conservation 24, 1775-1796.
Strong & Sherry 2001	2001	Wilson Bulletin	0.656	2	0	Foreign_only	NA	No	No	Strong, A.M., Sherry, T.W., 2001. Body Condition of Swainson's Warblers Wintering in Jamaica and the Conservation Value of Caribbean Dry Forests. The Wilson Bulletin 113, 410-418.
Stuart et al 2012	2012	Proceedings of the Royal Society B-Biological Sciences	5.051	3	0	Foreign_only	NA	No	No	Stuart, Y.E., Losos, J.B., Algar, A.C., 2012. The island-mainland species turnover relationship. Proceedings of the Royal Society B-Biological Sciences 279, 4071-4077.
Sunagawa et al 2009	2009	ISME Journal	9.302	9	1	Carib_&_Foreign	OT	Yes	No	Sunagawa, S., DeSantis, T.Z., Piceno, Y.M., Brodie, E.L., DeSalvo, M.K., Voolstra, C.R., Weil, E., Andersen, G.L., Medina, M., 2009. Bacterial diversity and White Plague Disease-associated community changes in the Caribbean coral Montastraea faveolata. ISME J 3, 512-521.
Svensson-Coelho & Ricklefs 2011	2011	Journal of Animal Ecology	4.504	2	0	Foreign_only	NA	No	No	Svensson-Coelho, M., Ricklefs, R.E., 2011. Host phylogeography and beta diversity in avian haemosporidian (Plasmodiidae) assemblages of the Lesser Antilles. J Anim Ecol 80, 938-946.
Tejedor et al 2005	2005	American Museum Novitates	2.186	3	1	Carib_&_Foreign	SS	Yes	Yes	Tejedor, A., Tavares, V.D.C., Silva-Taboada, G., 2005. A Revision of Extant Greater Antillean Bats of the Genus Natalus. American Museum Novitates 3493.
Thacker et al 2010	2010	Plos One	3.234	9	0	Foreign_only	NA	No	No	Thacker, R.W., Diaz, M.C., de Voogd, N.J., van Soest, R.W., Freeman, C.J., Mobley, A.S., LaPietra, J., Cope, K., McKenna, S., 2010. Preliminary assessment of sponge biodiversity on Saba Bank, Netherlands Antilles. PLoS One 5, e9622.
Thorpe et al 2015	2015	Molecular Ecology	6.494	4	0	Foreign_only	NA	No	No	Thorpe, R.S., Barlow, A., Malhotra, A., Surget-Groba, Y., 2015. Widespread parallel population adaptation to climate variation across a radiation: implications for adaptation to climate change. Mol Ecol 24, 1019-1030.
Todaro et al 2014	2014	Systematics and Biodiversity	2.191	3	0	Foreign_only	NA	No	No	Todaro, M.A., Leasi, F., Hochberg, R., 2014. A new species, genus and family of marine Gastrotricha from Jamaica, with a phylogenetic analysis of Macrodasyida based on molecular data. Systematics and Biodiversity 12, 473-488.
Tole 2002	2002	Biodiversity and Conservation	2.365	1	0	Foreign_only	NA	No	No	Tole, L., 2002. Habitat loss and anthropogenic disturbance in Jamaica's Hellshire Hills area. Biodivers Conserv 11:575-598
Toledo-Hernandez et al 2014	2014	Aquatic Invasions	1.613	9	8	Carib_&_Foreign	OT	Yes	Yes	Toledo-Hernández, C., Vélez-Zuazo, X., Ruiz-Diaz, C. P., Patricio, A. R., Mège, P., Navarro, M., Sabat, A. M., Betancur-R, R., Papa, R., 2014. Population ecology and genetics of the invasive lionfish in Puerto Rico. Aquatic Invasions 9, 227-237
Torres-Cambas et al 2015	2015	International Journal of Odonatology	0.686	6	4	Carib_&_Foreign	SS	Yes	Yes	Torres-Cambas, Y., Trapero-Quintana, A.D., Lorenzo-Carballa, M.O., Newell, D., Suriel, C., Cordero-Rivera, A., 2015. An update on the distribution of threatened odonate species from the Greater Antilles. International Journal of Odonatology 18, 89-104.
Torres-Pratts et al 2009	2009	Journal of the Marine Biological Association of the UK	1.064	3	3	Carib_only	OT	Yes	Yes	Torres-Pratts, H., Scharer, M. T., Schizas, N. V., 2009. Genetic diversity of Chelonibia caretta, commensal barnacles ofthe endangered hawksbill sea turtle Eretmochelys imbricata from the Caribbean (Puerto Rico). Journal of the Marine Biological Association of the United Kingdom 89, 719-725
Torres-Suarez 2014	2014	Molecular Phylogenetics and Evolution	3.916	1	0	Foreign_only	NA	No	No	Torres-Suarez, O.L., 2014. Gorgonia mariae and Antillogorgia bipinnata populations inferred from compensatory base change analysis of the internal transcribed spacer 2. Mol Phylogenet Evol 79, 240-248.
Treglia et al 2013	2013	Caribbean Journal of Science	0.353	4	0	Foreign_only	NA	No	No	Treglia ML, Valiulis J, Leavitt DJ, Fitzgerald LA (2013) Establishment of the Puerto Rican ground lizard (Ameiva exsul: Teiidae), on St. Croix, US Virgin Islands: a threat to native fauna. Caribbean Journal of Science 47:360-365
Trembley et al 2006	2006	Biological Conservation	3.762	3	3	Carib_only	OT	Yes	Yes	Tremblay, R.L., Meléndez-Ackerman, E., Kapan, D., 2006. Do epiphytic orchids behave as metapopulations? Evidence from colonization, extinction rates and asynchronous population dynamics. Biological Conservation 129, 70-81.
Turgeon & Kramer 2012	2012	Journal of Animal Ecology	4.504	2	0	Foreign_only	NA	No	No	Turgeon, K., Kramer, D.L., 2012. Compensatory immigration depends on adjacent population size and habitat quality but not on landscape connectivity. J Anim Ecol 81, 1161-1170.
Turvey et al 2014	2014	Biological Conservation	3.762	7	2	Carib_&_Foreign	SS	Yes	No	Turvey, S.T., Fernández-Secades, C., Nuñez-Miño, J.M., Hart, T., Martinez, P., Brocca, J.L., Young, R.P., 2014. Is local ecological knowledge a useful conservation tool for small mammals in a Caribbean multicultural landscape? Biological Conservation 169, 189-197.
Turvey et al 2015	2015	Zootaxa	0.906	6	1	Carib_&_Foreign	SS	Yes	No	Turvey, S.T., Hansford, J., Kennerley, R.J., Nunez-Mino, J.M., Brocca, J.L., Young, R.P., 2015. A new subspecies of hutia (Plagiodontia, Capromyidae, Rodentia) from southern Hispaniola. Zootaxa 3957, 201-214.
Uyarra & Coté 2007	2007	Biological Conservation	3.762	2	0	Foreign_only	NA	No	No	Uyarra, M.C., Côté, I.M., 2007. The quest for cryptic creatures: Impacts of species-focused recreational diving on corals. Biological Conservation 136, 77-84.
Uyarra et al 2009	2009	Environmental Management	1.724	3	0	Foreign_only	NA	No	No	Uyarra, M.C., Watkinson, A.R., Cote, I.M., 2009. Managing dive tourism for the sustainable use of coral reefs: validating diver perceptions of attractive site features. Environ Manage 43, 1-16.
Vale et al 2012	2012	Systematic Botany	1.229	5	1	Carib_&_Foreign	SS	Yes	No	Vale, Á., Rojas, D., Acanda, Y., Sánchez-Abad, N.L., Navarro, L., 2012. A New Species of <I>Tetramicra</I> (Orchidaceae: Laeliinae) from Baracoa, Eastern Cuba. Systematic Botany 37, 883-892.
Vale et al 2014	2014	Systematic Botany	1.229	5	3	Carib_&_Foreign	SS	Yes	No	Vale, Á., Pérez-Obregón, R.A., Faife-Cabrera, M., Álvarez, J.C., Rojas, D., 2014. A New Orchid Species from the Keys of Central Cuba and a Checklist of Cuban <I>Encyclia</I> (Orchidaceae, Laeliinae). Systematic Botany 39, 1076-1082.
Valles & Oxenford 2014	2014	Plos One	3.234	2	2	Carib_only	SS	Yes	Yes	Valles, H., Oxenford, H.A., 2014. Parrotfish size: a simple yet useful alternative indicator of fishing effects on Caribbean reefs? PLoS One 9, e86291.
van der Meij 2014	2014	Bulletin of Marine Science	1.306	1	0	Foreign_only	NA	No	No	van der Meij, S.E.T., 2014. Host species, range extensions, and an observation of the mating system of Atlantic shallow-water gall crabs (Decapoda: Cryptochiridae). Bulletin of Marine Science 90, 1001-1010.
Van Hooidonk et al 2015	2015	Global Change Biology	8.044	4	0	Foreign_only	NA	No	No	van Hooidonk, R., Maynard, J.A., Liu, Y., Lee, S.K., 2015. Downscaled projections of Caribbean coral bleaching that can inform conservation planning. Glob Chang Biol 21, 3389-3401.
van Woesik et al 2012	2012	Proceedings of the Royal Society B-Biological Sciences	5.051	6	0	Foreign_only	NA	No	No	van Woesik, R., Franklin, E.C., O'Leary, J., McClanahan, T.R., Klaus, J.S., Budd, A.F., 2012. Hosts of the Plio-Pleistocene past reflect modern-day coral vulnerability. Proc. R. Soc. B-Biol. Sci. 279, 2448-2456.
Vasquez-Dominguez 2003	2003	Revista de Biologia Tropical	0.524	1	0	Foreign_only	NA	No	No	Vázquez-Domínguez, E., 2003. Diversity and distribution of crustaceans and echinoderms and their relation with sedimentation levels in coral reefs. Revista de Biologia Tropical 51, 183-193
Velazco & Patterson 2013	2013	Molecular Phylogenetics and Evolution	3.916	2	0	Foreign_only	NA	No	No	Velazco, P.M., Patterson, B.D., 2013. Diversification of the yellow-shouldered bats, genus Sturnira (Chiroptera, Phyllostomidae), in the New World tropics. Mol Phylogenet Evol 68, 683-698.
Velez-Zuazo et al 2008	2008	Molecular Ecology	6.494	6	5	Carib_&_Foreign	OT	Yes	Yes	Velez-Zuazo, X., Ramos, W.D., van Dam, R.P., Diez, C.E., Abreu-Grobois, A., McMillan, W.O., 2008. Dispersal, recruitment and migratory behaviour in a hawksbill sea turtle aggregation. Mol Ecol 17, 839-853.
Vermeij et al 2009	2009	Biological Invasions	2.586	4	2	Carib_&_Foreign	OT	Yes	Yes	Vermeij, M.J.A., Smith, T.B., Dailer, M.L., Smith, C.M., 2009. Release from native herbivores facilitates the persistence of invasive marine algae: a biogeographical comparison of the relative contribution of nutrients and herbivory to invasion success. Biological Invasions 11, 1463-1474.
Vermeij et al 2010	2010	Plos One	3.234	6	2	Carib_&_Foreign	OT	Yes	Yes	Vermeij, M.J., van Moorselaar, I., Engelhard, S., Hornlein, C., Vonk, S.M., Visser, P.M., 2010. The effects of nutrient enrichment and herbivore abundance on the ability of turf algae to overgrow coral in the Caribbean. PLoS One 5, e14312.
Vianna et al 2006	2006	Molecular Ecology	6.494	14	2	Carib_&_Foreign	OT	Yes	No	Vianna, J.A., Bonde, R.K., Caballero, S., Giraldo, J.P., Lima, R.P., Clark, A., Marmontel, M., Morales-Vela, B., De Souza, M.J., Parr, L., Rodriguez-Lopez, M.A., Mignucci-Giannoni, A.A., Powell, J.A., Santos, F.R., 2006. Phylogeography, phylogeny and hybridization in trichechid sirenians: implications for manatee conservation. Mol Ecol 15, 433-447.
Vicente et al 2013	2013	Marine Biotechnology	3.269	5	0	Foreign_only	NA	No	No	Vicente, J., Stewart, A., Song, B., Hill, R.T., Wright, J.L., 2013. Biodiversity of Actinomycetes associated with Caribbean sponges and their potential for natural product discovery. Mar Biotechnol (NY) 15, 413-424.
Vilella & Nimitz 2012	2012	The Wilson Journal of Ornithology	0.596	2	0	Foreign_only	NA	No	No	Vilella, F.J., Nimitz, W.F., 2012. Spatial Dynamics of the Red-Tailed Hawk in the Luquillo Mountains of Puerto Rico. The Wilson Journal of Ornithology 124, 758-766.
Vollmer & Palumbi 2007	2007	Journal of Heredity	2.088	2	0	Foreign_only	NA	No	No	Vollmer, S.V., Palumbi, S.R., 2007. Restricted gene flow in the Caribbean staghorn coral Acropora cervicornis: implications for the recovery of endangered reefs. J Hered 98, 40-50.
Vuillaume et al 2015	2015	Plos One	3.234	5	0	Foreign_only	NA	No	No	Vuillaume, B., Valette, V., Lepais, O., Grandjean, F., Breuil, M., 2015. Genetic Evidence of Hybridization between the Endangered Native Species Iguana delicatissima and the Invasive Iguana iguana (Reptilia, Iguanidae) in the Lesser Antilles: Management Implications. PLoS One 10, e0127575.
Walcott & Horrocks 2014	2014	Bulletin of Marine Science	1.306	2	2	Carib_only	SS	Yes	Yes	Walcott, J., Horrocks, J.A., 2014. Design of a protected area for inter-nesting hawksbills in Barbados: an evidence-based approach. Bulletin of Marine Science 90, 969-987.
Walker & Gibson 2015	2015	Chelonian Conservation and Biology	0.738	2	1	Carib_&_Foreign	SS	Yes	Yes	Walker, G., Gibson, K.W., 2015. First Documented Evidence of a Rookery of the Critically Endangered Hawksbill Sea Turtle (Eretmochelys imbricata) in North East Tobago. Chelonian Conservation and Biology 14, 95-99.
Ward-Paige et al 2010	2010	Plos One	3.234	7	0	Foreign_only	NA	No	No	Ward-Paige, C.A., Mora, C., Lotze, H.K., Pattengill-Semmens, C., McClenachan, L., Arias-Castro, E., Myers, R.A., 2010. Large-scale absence of sharks on reefs in the greater-Caribbean: a footprint of human pressures. PLoS One 5, e11968.
Warner 2005	2005	Revista de Biologia Tropical	0.524	1	1	Carib_only	SS	Yes	Yes	Warner, G. F., 2005. The occurrence of black corals in Jamaican reef environments, with special reference to Stichopathes lutkeni (Antipatharia: Antipathidae). Revista de Biología Tropical 53, 61-66.
Wear & Thurber 2015	2015	Annals of the New York Academy of Sciences	4.383	2	0	Foreign_only	NA	No	No	Wear, S.L., Thurber, R.V., 2015. Sewage pollution: mitigation is key for coral reef stewardship. Ann N Y Acad Sci 1355, 15-30.
Weigt et al 2012	2012	Plos One	3.234	6	0	Foreign_only	NA	No	No	Weigt, L.A., Baldwin, C.C., Driskell, A., Smith, D.G., Ormos, A., Reyier, E.A., 2012. Using DNA barcoding to assess Caribbean reef fish biodiversity: expanding taxonomic and geographic coverage. PLoS One 7, e41059.
Weil 2006	2006	Revista de Biologia Tropical	0.524	1	1	Carib_only	OT	Yes	Yes	Weil, E., 2006. Diversity and relative abundance of corals, octocorals and sponges at Jaragua National Park, Dominican Republic. Revista de Biologia Tropical 54, 423-443.
Weiss & Hedges 2007	2007	Molecular Phylogenetics and Evolution	3.916	2	0	Foreign_only	NA	No	No	Weiss, A.J., Hedges, S.B., 2007. Molecular phylogeny and biogeography of the Antillean geckos Phyllodactylus wirshingi, Tarentola americana, and Hemidactylus haitianus (Reptilia, Squamata). Mol Phylogenet Evol 45, 409-416.
Whaylen et al 2004	2004	Environmental Biology of Fishes	1.57	5	1	Carib_&_Foreign	OT	Yes	No	Whaylen L, Pattengill-Semmens CV, Semmens BX, Bush PG, Boardman MR (2004) Observations of a Nassau grouper, Epinephelus striatus, spawning aggregation site in Little Cayman, Cayman Islands, including multi-species spawning information. Environ Biol Fishes 70:305-313
Wheeler et al 2007	2007	Biochemical Systematics and Ecology	0.967	4	0	Foreign_only	NA	No	No	Wheeler, G.S., Pratt, P.D., Giblin-Davis, R.M., Ordung, K.M., 2007. Intraspecific variation of Melaleuca quinquenervia leaf oils in its naturalized range in Florida, the Caribbean, and Hawaii. Biochemical Systematics and Ecology 35, 489-500.
Whitall et al 2012	2012	Tropical Conservation Science	1.125	3	0	Foreign_only	NA	No	No	Whitall D, Mason A, Pait A (2012) Nutrient Dynamics in Coastal Lagoons and Marine Waters of Vieques, Puerto Rico. Tropical Conservation Science 5:495-509
White 2007	2007	Ecology Letters	10.689	1	0	Foreign_only	NA	No	No	White, J.W., 2007. Spatially correlated recruitment of a marine predator and its prey shapes the large-scale pattern of density-dependent prey mortality. Ecol Lett 10, 1054-1065.
White et al 2005	2005	Ornitologia Neotropical	0.309	4	1	Carib_&_Foreign	SS	Yes	Yes	White TH, Collazo JA, Vilella FJ, Guerrer SA (2005) Effects of Hurricane Georges on habitat use by captive-reared Hispaniolan Parrots (Amazona ventralis) released in the Dominican Republic. Ornitologia Neotropical 16:405-417
White et al 2012	2012	Bird Conservation International	1.784	6	0	Foreign_only	NA	No	No	White, R.L., Baptiste, T.J., Dornelly, A., Morton, M.N., O’Connell, M.J., Young, R.P., 2012. Population responses of the Endangered White-breasted Thrasher Ramphocinclus brachyurus to a tourist development in Saint Lucia – conservation implications from a spatial modelling approach. Bird Conservation International 22, 468-485.
Whitehouse et al 2010	2010	Journal of Wildlife Diseases	1.355	5	2	Carib_&_Foreign	SS	Yes	Yes	Whitehouse, C.A., Keirstead, N., Taylor, J., Reinhardt, J.L., Beierschmitt, A., 2010. Prevalence of hypermucoid Klebsiella pneumoniae among wild-caught and captive vervet monkeys (Chlorocebus aethiops sabaeus) on the island of St. Kitts. J Wildl Dis 46, 971-976.
Wilder & Hollocher 2003	2003	Evolution	4.612	2	0	Foreign_only	NA	No	No	Wilder, J. A., Hollocher, H., 2003. Recent radiation of endemic Caribbean Drosophila of the dunni subgroup inferred from multilocus DNA sequence variation. Evolution 57, 2566-2579
Wilkinson et al 2013	2013	Marine Pollution Bulletin	2.991	4	0	Foreign_only	NA	No	No	Wilkinson, C., Nowak, M., Miller, I., Baker, V., 2013. Status of Caribbean coral reefs in seven countries in 1986. Mar Pollut Bull 70, 7-9.
Willette & Ambrose 2009	2009	Aquatic Botany	1.608	2	0	Foreign_only	NA	No	No	Willette, D.A., Ambrose, R.F., 2009. The distribution and expansion of the invasive seagrass Halophila stipulacea in Dominica, West Indies, with a preliminary report from St. Lucia. Aquatic Botany 91, 137-142.
Williams & Polunin 2000	2000	Environmental Conservation	2.368	2	0	Foreign_only	NA	No	No	Williams ID, Polunin NVC, 2000. Differences between protected and unprotected reefs of the western Caribbean in attributes preferred by dive tourists. Environmental Conservation 27:382-391
Williams et al 2010	2010	Plos One	3.234	7	2	Carib_&_Foreign	OT	Yes	No	Williams, J.T., Carpenter, K.E., Van Tassell, J.L., Hoetjes, P., Toller, W., Etnoyer, P., Smith, M., 2010. Biodiversity assessment of the fishes of Saba Bank atoll, Netherlands Antilles. PLoS One 5, e10676.
Wilson & Vogel 2000	2000	Caribbean Journal of Science	0.353	2	2	Carib_only	SS	Yes	Yes	Wilson, B. S., & Vogel, P., (2000). A survey of the herpetofauna of the Hellshire Hills, Jamaica, including the rediscovery of the Blue-tailed Galliwasp (Celestus duquesneyi Grant). Caribbean Journal of Science 36, 244-249.
Wilson et al 2011	2011	Biological Invasions	2.586	5	4	Carib_&_Foreign	SS	Yes	Yes	Wilson, B.S., Koenig, S.E., van Veen, R., Miersma, E., Craig Rudolph, D., 2011. Cane toads a threat to West Indian wildlife: mortality of Jamaican boas attributable to toad ingestion. Biological Invasions 13, 55-60.
Wilson et al 2011	2011	Ecology	4.656	4	0	Foreign_only	NA	No	No	Wilson, S., LaDeau, S. L., Tottrup, A. P., Marra, P. P., 2011. Range-wide effects of breeding- and nonbreeding-season climate on the abundance of a Neotropical migrant songbird. Ecology 92, 1789-1798
Winker & Graves 2008	2008	Wilson Journal of Ornithology	0.596	2	0	Foreign_only	NA	No	No	Winker, K., Graves, G.R., 2008. Genetic structure of breeding and wintering populations of Swainson's Warbler. The Wilson Journal of Ornithology 120, 433-445.
Wong et al 2012	2012	Aquatic Mammals	1.015	9	0	Foreign_only	NA	No	No	Wong, A.W., Bonde, R.K., Siegal-Willott, J., Stamper, M.A., Colee, J., Powell, J.A., Reid, J.P., Deutsch, C.J., Harr, K.E., 2012. Monitoring oral temperature, heart rate, and respiration rate of West Indian manatees (Trichechus manatus) during capture and handling in the field. Aquatic Mammals 38, 1-16.
Woolaver et al 2013	2013	Journal of Field Ornithology	0.988	4	0	Foreign_only	NA	No	No	Woolaver, L.G., Nichols, R.K., Morton, E.S., Stutchbury, B.J.M., 2013. Feeding ecology and specialist diet of critically endangered Ridgway's Hawks. Journal of Field Ornithology 84, 138-146.
Woolaver et al 2013	2013	Conservation Genetics	2.185	4	0	Foreign_only	NA	No	No	Woolaver, L.G., Nichols, R.K., Morton, E.S., Stutchbury, B.J.M., 2013. Population genetics and relatedness in a critically endangered island raptor, Ridgway’s Hawk Buteo ridgwayi. Conservation Genetics 14, 559-571.
Woolaver et al 2015	2015	Bird Conservation International	1.784	4	0	Foreign_only	NA	No	No	Woolaver, L. G., Nichols, R. K., Morton, E. S., & Stutchbury, B. J., 2015. Breeding ecology and predictors of nest success in the Critically Endangered Ridgway’s Hawk Buteo ridgwayi. Bird Conservation International 25, 385-398.
Wright et al 2001	2001	Conservation Biology	4.165	25	4	Carib_&_Foreign	SS+OT	Yes	No	Wright, T.F., Toft, C.A., Enkerlin-Hoeflich, E., Gonzalez-Elizondo, J., Albornoz, M., Rodriguez-Ferraro, A., Rojas-Suarez, F., Sanz, V., Trujillo, A., Beissinger, S.R., Berovides A, V., Galvez A, X., Brice, A.T., Joyner, K., Eberhard, J., Gilardi, J., Koenig, S.E., Stoleson, S., Martuscelli, P., Meyers, J.M., Renton, K., Rodriguez, A.M., Sosa-Asanza, A.C., Vilella, F.J., Wiley, J.W., 2001. Nest p…
Young et al 2006	2006	Oryx	1.849	6	0	Foreign_only	NA	No	No	Young, R.P., Fa, J.E., Ogrodowczyk, A., Morton, M., Lesmond, S., Funk, S.M., 2006. The St Lucia whiptail lizard Cnemidophorus vanzoi: a conservation dilemma? Oryx 40, 358-361.
Young et al 2010	2010	Bird Conservation International	1.784	7	2	Carib_&_Foreign	SS	Yes	No	Young, R.P., Jn Baptiste, T., Dornelly, A., Temple, H., Whitehead, H., Young, H.G., Morton, M.N., 2010. Potential impacts of tourist developments in St Lucia on the Endangered White-breasted Thrasher Ramphocinclus brachyurus. Bird Conservation International 20, 354-364.
Young et al 2012	2012	Bulletin of Marine Science	1.306	3	0	Foreign_only	NA	No	No	Young, C.N., Schopmeyer, S.A., Lirman, D., 2012. A Review of Reef Restoration and Coral Propagation Using the Threatened Genus Acropora in the Caribbean and Western Atlantic. Bulletin of Marine Science 88, 1075-1098.
Zamin et al 2010	2010	Conservation Biology	4.165	6	0	Foreign_only	NA	No	No	Zamin, T.J., Baillie, J.E., Miller, R.M., Rodriguez, J.P., Ardid, A., Collen, B., 2010. National red listing beyond the 2010 target. Conserv Biol 24, 1012-1020.
Zhang & Maddison 2013	2013	Molecular Phylogenetics and Evolution	3.916	2	0	Foreign_only	NA	No	No	Zhang, J.X., Maddison, W.P., 2013. Molecular phylogeny, divergence times and biogeography of spiders of the subfamily Euophryinae (Araneae: Salticidae). Mol Phylogenet Evol 68, 81-92.
Zona et al 2007	2007	Oryx	1.849	5	2	Carib_&_Foreign	SS	Yes	No	Zona, S., Verdecia, R., Sánchez, A. L., Lewis, C. E., & Maunder, M., 2007. The conservation status of West Indian palms (Arecaceae). Oryx 41, 300-305
Zychaluk et al 2012	2012	Ecology Letters	10.689	5	0	Foreign_only	NA	No	No	Zychaluk, K., Bruno, J.F., Clancy, D., McClanahan, T.R., Spencer, M., 2012. Data-driven models for regional coral-reef dynamics. Ecol Lett 15, 151-158.
