# Supplementary material
Source: Elsevier journal article supplement (https://www.sciencedirect.com/science/article/pii/S2530064421000729)
Supplement: mmc2 [file S2530064421000729:mmc2.xlsx]

## Sheet: collaboration matrix
	Antigua_Barbuda	Bahamas	Barbados	Cuba	Dominica	Dominican.Republic	Grenada	Haiti	Jamaica	St.Kitts_Nevis	St.Lucia	Trinidad_Tobago	Anguilla	British.Virgin.Islands	Cayman.islands	US.Virgin.Islands	Montserrat	Turks_Caicos	Bonaire	Curacao	Saba	St.Martin	St.Eustasius	Guadeloupe	Martinique	Puerto.Rico
Antigua_Barbuda	NA	0	0	0	0	0	0	0	0	0	0	0	0	0	0	0	0	0	0	0	0	0	0	0	0	0
Bahamas	0	NA	1	0	0	0	0	0	0	0	0	0	0	0	0	0	0	0	0	0	0	0	0	0	0	0
Barbados	0	1	NA	0	0	0	2	0	0	1	0	0	0	1	0	0	0	0	0	0	0	0	0	0	0	1
Cuba	0	0	0	NA	0	2	0	0	3	0	1	1	0	0	0	0	0	0	0	0	0	0	0	0	0	3
Dominica	0	0	0	0	NA	0	0	0	0	0	0	0	0	0	0	0	0	0	0	0	0	0	0	0	0	0
Dominican.Republic	0	0	0	2	0	NA	0	1	2	0	0	0	0	0	1	0	0	0	0	0	0	0	0	0	0	0
Grenada	0	0	2	0	0	0	NA	0	0	1	0	0	0	0	0	0	0	0	0	0	0	0	0	0	0	0
Haiti	0	0	0	0	0	1	0	NA	0	0	0	0	0	0	0	0	0	0	0	0	0	0	0	0	0	0
Jamaica	0	0	0	3	0	2	0	0	NA	0	0	0	0	0	0	1	0	0	0	0	0	0	0	0	0	1
St.Kitts_Nevis	0	0	1	0	0	0	1	0	0	NA	0	0	0	0	0	0	0	0	0	0	0	0	0	0	0	0
St.Lucia	0	0	0	1	0	0	0	0	0	0	NA	0	0	0	0	0	0	0	0	0	0	0	0	0	0	1
Trinidad_Tobago	0	0	0	1	0	0	0	0	0	0	0	NA	0	0	0	0	0	0	0	0	0	0	0	0	0	1
Anguilla	0	0	0	0	0	0	0	0	0	0	0	0	NA	0	0	0	0	0	0	0	0	0	0	0	0	0
British.Virgin.Islands	0	0	1	0	0	0	0	0	0	0	0	0	0	NA	0	0	0	0	0	0	0	0	0	0	0	0
Cayman.islands	0	0	0	0	0	1	0	0	0	0	0	0	0	0	NA	1	0	1	0	0	0	0	0	0	0	1
US.Virgin.Islands	0	0	0	0	0	0	0	0	1	0	0	0	0	0	1	NA	0	1	0	1	0	0	0	0	0	4
Montserrat	0	0	0	0	0	0	0	0	0	0	0	0	0	0	0	0	NA	0	0	0	0	0	0	0	0	0
Turks_Caicos	0	0	0	0	0	0	0	0	0	0	0	0	0	0	1	1	0	NA	0	0	0	0	0	0	0	1
Bonaire	0	0	0	0	0	0	0	0	0	0	0	0	0	0	0	0	0	0	NA	0	0	1	0	0	0	0
Curacao	0	0	0	0	0	0	0	0	0	0	0	0	0	0	0	1	0	0	0	NA	1	1	1	0	0	0
Saba	0	0	0	0	0	0	0	0	0	0	0	0	0	0	0	0	0	0	0	1	NA	0	0	0	0	0
St.Martin	0	0	0	0	0	0	0	0	0	0	0	0	0	0	0	0	0	0	1	1	0	NA	1	0	0	0
St.Eustasius	0	0	0	0	0	0	0	0	0	0	0	0	0	0	0	0	0	0	0	1	0	1	NA	0	0	1
Guadeloupe	0	0	0	0	0	0	0	0	0	0	0	0	0	0	0	0	0	0	0	0	0	0	0	NA	1	0
Martinique	0	0	0	0	0	0	0	0	0	0	0	0	0	0	0	0	0	0	0	0	0	0	0	1	NA	0
Puerto.Rico	0	0	1	3	0	0	0	0	1	0	1	1	0	0	1	4	0	1	0	0	0	0	1	0	0	NA
Numbers in matrix indicate number of paper collaborations
