# Supplementary material
Source: Elsevier journal article supplement (https://www.sciencedirect.com/science/article/pii/S2530064421000729)
Supplement: mmc3 [file S2530064421000729:mmc3.docx]

Fig S1. Total number of peer-reviewed paper authorships on biodiversity conservation in the insular Caribbean between 2000 and 2015 including Caribbean-based authors from sovereign states, British Overseas Territories (OT), Dutch Overseas Territories, French Overseas Territories and USA Overseas Territories.
